# Supplementary material for: Randomised, Double Blind, Controlled Trial of the Provision of Information about the Benefits of Organ Donation during a Family Donation Conversation
Source: PLoS One. 2016 Jun 20;11(6):e0155778. doi: 10.1371/journal.pone.0155778 (PMC4913899; doi:10.1371/journal.pone.0155778)
Supplement: S1 File — (XLS) [file pone.0155778.s001.xls]

## Sheet: Sheet1
How old are you?	What is your gender?		What is your home postcode?	Do you speak any language other than english at home?		What is your religious affiliation?		What are your usual working hours?	Do you know anyone who has received a human organ or tissue transplant?	Do you know anyone who has been an organ or tissue donor?	Have you ever been asked to consider organ and tissue donation on behalf of a friend or relative?	If you were ever in the position, would you wish to be an organ donor?	Are you registered on the Australian Organ Donor Register?	Have you spoken to your family or friends about organ and tissue donation?	Most people are able to donate their organs when they die.	VIDEO RANDOM ASSIGNMENT	Please answer the following questions:
Response	Response	Other (please specify)	Open-Ended Response	Response	Other (please specify)	Response	Other (please specify)	Response	Response	Response	Response	Response	Response	Response	Response		The doctor cared about Shaun and his family	The doctor cared more about people waiting for transplants than about Shaun and his family	The doctor was helping Joanne to make a decision about organ donation that was best for Shaun and his family	The doctor provided enough information for Joanne to make a decision	I was uncomfortable listening to what the doctor was saying	The doctor was trying to convince Joanne to say yes to organ donation	Not many people die in a way that allows them to be an organ donor	The doctor gave Joanne too much information about the benefits of organ donation	It is important that Joanne makes a decision that is right for her and Shaun	Joanne should have been given more information about the need for organ donation and the benefits of organ donation
28	Male		2232	Mandarin		Buddhism		Full time	No	No	Yes	Yes	No	No	Don't know	Text Random Assignment - Neutral	Agree	Agree	Agree	Agree	Agree	Agree	Agree	Agree	Agree	Agree
34	Female		2444	No		Catholic		Full time	No	No	No	Yes	No	No	Agree	Text Random Assignment - Neutral	Strongly agree	Undecided	Agree	Strongly agree	Disagree	Strongly disagree	Disagree	Disagree	Agree	Disagree
41	Female		6169	No		No religion		Full time	No	No	No	Yes	Yes	Yes	Agree	Text Random Assignment - Neutral	Agree	Disagree	Agree	Agree	Agree	Disagree	Disagree	Disagree	Agree	Disagree
40	Female		3070	No		No religion		Part time	No	No	No	Yes	Yes	Yes	Don't know	Text Random Assignment - Neutral	Agree	Agree	Agree	Agree	Disagree	Undecided	Agree	Disagree	Agree	Agree
53	Male		3199	No		No religion		Full time	No	No	No	Unsure	No	No	Don't know	Text Random Assignment - balanced	Undecided	Undecided	Undecided	Undecided	Undecided	Strongly agree	Undecided	Undecided	Strongly agree	Strongly agree
58	Male		6058	No		No religion		Full time	Yes	Yes	No	Yes	No	Yes	Don't know	Text Random Assignment - balanced	Undecided	Undecided	Undecided	Undecided	Undecided	Undecided	Undecided	Undecided	Undecided	Undecided
32	Male		400058	Arabic		No religion		Full time	No	Yes	No	Yes	No	No	Don't know	Text Random Assignment - balanced
34	Female		3350	No		No religion		Full time	Yes	Yes	No	Unsure	No	Yes	Agree	Text Random Assignment - balanced
60	Male		3195	No		Catholic		Full time	Yes	Yes	Yes	Yes	Yes	Yes	Agree	Text Random Assignment - balanced	Disagree	Strongly agree	Strongly disagree	Strongly disagree	Disagree	Strongly agree	Strongly disagree	Strongly agree	Strongly agree	Disagree
46	Female		4500	No		Catholic		Full time	Yes	Yes	Yes	Yes	Yes	Yes	Agree	Text Random Assignment - balanced
39	Female		5072	No		Catholic		Part time	No	No	No	Yes	No	Yes	Agree	Text Random Assignment - Neutral	Strongly agree	Strongly disagree	Strongly agree	Undecided	Agree	Disagree	Disagree	Disagree	Agree	Undecided
40	Male		2066	Greek		No religion		Full time	No	No	No	Yes	No	Yes	Agree	Text Random Assignment - Neutral	Agree	Undecided	Disagree	Agree	Undecided	Agree	Agree	Disagree	Undecided	Disagree
25	Female		3151	No		Catholic		Full time	No	No	No	Yes	Yes	Yes	Don't know	Text Random Assignment - Neutral	Agree	Disagree	Undecided	Undecided	Disagree	Disagree	Undecided	Strongly disagree	Agree	Undecided
24	Male		3030	No		Catholic		Full time	No	No	No	Unsure	No	No	Agree	Text Random Assignment - balanced	Undecided	Agree	Undecided	Disagree	Disagree	Agree	Strongly agree	Disagree	Agree	Agree
45
55	Female		3058	No		Catholic		Full time	Yes	No	No	Yes	No	Yes	Agree	Text Random Assignment - balanced	Agree	Agree	Disagree	Disagree	Strongly disagree	Agree	Undecided	Disagree	Strongly agree	Agree
39	Male		4502	No		No religion		Full time	No	No	No	Unsure	No	No	Don't know	Text Random Assignment - Neutral	Agree	Agree	Agree	Agree	Undecided	Undecided	Undecided	Agree	Strongly agree	Agree
42	Female		3101	No		No religion		Full time	No	No	No	Yes	No	Yes	Agree	Text Random Assignment - balanced	Strongly agree	Disagree	Undecided	Undecided	Strongly disagree	Strongly agree	Strongly agree	Strongly disagree	Agree	Disagree
56	Male		2143	No		Christian (other)		Full time	No	No	No	Unsure	No	Yes	Don't know	Text Random Assignment - balanced	Undecided	Undecided	Undecided	Undecided	Undecided	Undecided	Undecided	Undecided	Undecided	Undecided
61	Male		3551	No		Christian (other)		Full time	No	No	No	Unsure	Yes	Yes	Don't know	Text Random Assignment - balanced	Agree	Undecided	Undecided	Agree	Strongly agree	Agree	Agree	Disagree	Strongly agree	Undecided
50	Male		3103	No		Catholic		Full time	No	No	No	Yes	No	No	Agree	Text Random Assignment - Neutral	Disagree	Agree	Disagree	Disagree	Disagree	Strongly agree	Disagree	Undecided	Strongly agree	Agree
42	Male		2227	No		Christian (other)		Full time	No	Yes	No	Unsure	No	No	Don't know	Text Random Assignment - balanced	Agree	Undecided	Undecided	Agree	Agree	Agree	Undecided	Disagree	Agree	Disagree
48	Female		4112	No		No religion		Full time	No	No	No	Yes	Yes	No	Don't know	Text Random Assignment - Neutral	Agree	Disagree	Agree	Agree	Disagree	Agree	Undecided	Disagree	Agree	Undecided
50	Male		6102	No		No religion		Full time	Yes	No	No	Yes	No	Yes	Agree	Text Random Assignment - balanced
47	Male		3132	No		Catholic		Full time	No	No	No	Yes	No	No	Don't know	Text Random Assignment - Neutral	Agree	Undecided	Undecided	Agree	Disagree	Disagree	Undecided	Disagree	Agree	Agree
43	Male		3039	No		Christian (other)		Full time	No	No	Yes	Yes	Yes	No	Don't know	Text Random Assignment - Neutral	Agree	Undecided	Undecided	Agree	Agree	Disagree	Undecided	Disagree	Strongly agree	Agree
36
25	Female		2047	No		Christian (other)		Full time	Yes	No	No	Yes	Yes	Yes	Disagree	Text Random Assignment - Neutral	Agree	Agree	Agree	Agree	Agree	Agree	Agree	Agree	Agree	Agree
23	Female		2173	Other (please specify)	Bangla	No religion		Full time	No	No	No	Yes	No	No	Don't know	Text Random Assignment - Neutral	Undecided	Undecided	Undecided	Undecided	Undecided	Undecided	Undecided	Undecided	Undecided	Undecided
21	Female		2209	No		No religion		Full time	Yes	No	No	Unsure	No	Yes	Agree	Text Random Assignment - balanced	Agree	Undecided	Agree	Agree	Disagree	Agree	Agree	Disagree	Strongly agree	Agree
43	Female		3111	No		Christian (other)		Full time	Yes	No	No	Unsure	No	No	Agree	Text Random Assignment - balanced	Agree	Disagree	Agree	Disagree	Disagree	Disagree	Undecided	Disagree	Strongly agree	Agree
43	Female		3111	No		Christian (other)		Full time	Yes	No	No	Unsure	No	No	Agree
47	Female		2603	No		Catholic		Full time	No	Yes	No	Unsure	No	No	Don't know	Text Random Assignment - balanced	Strongly agree	Disagree	Undecided	Disagree	Disagree	Undecided	Agree	Disagree	Undecided	Disagree
43	Male		2090	No		No religion		Full time	No	No	No	Yes	Yes	No	Agree	Text Random Assignment - Neutral	Strongly agree	Disagree	Agree	Agree	Disagree	Agree	Agree	Disagree	Agree	Undecided
45	Male		2230	No		Catholic		Full time	No	No	No	Yes	No	Yes	Agree	Text Random Assignment - Neutral	Agree	Agree	Strongly agree	Agree	Agree	Undecided	Disagree	Disagree	Strongly agree	Disagree
27	Female		3161	No		No religion		Full time	No	No	No	Yes	No	Yes	Disagree	Text Random Assignment - Neutral	Agree	Disagree	Agree	Agree	Disagree	Agree	Disagree	Disagree	Agree	Agree
35	Female		3044	No		No religion		Full time	No	Yes	Yes	Yes	Yes	Yes	Agree	Text Random Assignment - Neutral	Agree	Disagree	Disagree	Agree	Strongly disagree	Strongly disagree	Strongly disagree	Disagree	Strongly agree	Disagree
48	Female		2914	No		Christian (other)		Full time	No	No	No	Yes	No	Yes	Agree	Text Random Assignment - balanced	Strongly agree	Disagree	Agree	Agree	Disagree	Disagree	Agree	Disagree	Strongly agree	Agree
42	Female		3121	No		No religion		Full time	No	No	No	Unsure	Yes	Yes	Agree	Text Random Assignment - Neutral	Strongly agree	Disagree	Strongly agree	Agree	Agree	Disagree	Agree	Disagree	Strongly agree	Agree
23	Female		2173	Other (please specify)	Bangla	No religion		Full time	No	No	No	Yes	No	No	Agree
43	Female		3003	No		Other (please specify)	non practising, raised as catholic	Full time	No	No	No	Yes	No	Yes	Don't know	Text Random Assignment - Neutral	Strongly agree	Disagree	Agree	Agree	Strongly disagree	Disagree	Disagree	Disagree	Strongly agree	Disagree
40	Male		3051	No		Catholic		Full time	No	Yes	No	Yes	Yes	Yes	Agree	Text Random Assignment - Neutral	Agree	Disagree	Agree	Agree	Agree	Disagree	Undecided	Disagree	Agree	Disagree
34	Female		3013	No		Catholic		Full time	No	No	No	Yes	Yes	Yes	Don't know	Text Random Assignment - Neutral	Agree	Disagree	Agree	Agree	Agree	Agree	Undecided	Disagree	Agree	Agree
24	Female		2066	No		Catholic		Full time	No	No	Yes	Yes	No	Yes	Disagree	Text Random Assignment - balanced
35
44	Male		2147	No		Christian (other)		Full time	Yes	Yes	Yes	Yes	Yes	Yes	Agree	Text Random Assignment - balanced	Agree	Undecided	Agree	Strongly agree	Disagree	Disagree	Strongly agree	Disagree	Strongly agree	Undecided
27	Male		3006	No		Catholic		Full time	No	No	No	Yes	Yes	Yes	Don't know	Text Random Assignment - balanced	Agree	Disagree	Agree	Agree	Disagree	Disagree	Agree	Disagree	Strongly agree	Strongly disagree
50	Male		2560	Greek		Catholic		Full time	Yes	Yes	No	Yes	Yes	Yes	Agree	Text Random Assignment - Neutral	Agree	Disagree	Undecided	Agree	Disagree	Disagree	Undecided	Agree	Strongly agree	Undecided
48	Male		2570	No		Christian (other)		Full time	Yes	Yes	Yes	Yes	Yes	Yes	Agree	Text Random Assignment - balanced	Undecided	Agree	Agree	Disagree	Undecided	Strongly agree	Strongly disagree	Disagree	Strongly agree	Agree
39	Female		2019	No		No religion		Full time	No	No	No	Unsure	No	Yes	Agree	Text Random Assignment - Neutral	Agree	Disagree	Agree	Agree	Disagree	Disagree	Undecided	Disagree	Strongly agree	Undecided
34	Female		2444	No		Catholic		Full time	No	No	No	Yes	No	No	Disagree
60	Female		3196	No		Christian (other)		Full time	Yes	No	No	Yes	Yes	No	Agree	Text Random Assignment - Neutral	Agree	Disagree	Agree	Agree	Agree	Disagree	Disagree	Disagree	Agree	Disagree
31	Male		3042	No		No religion		Full time	No	No	Yes	Unsure	No	No	Agree	Text Random Assignment - Neutral	Agree	Undecided	Agree	Disagree	Disagree	Disagree	Undecided	Disagree	Strongly agree	Agree
46	Female		3184	No		No religion		Full time	No	No	No	Yes	No	Yes	Don't know	Text Random Assignment - Neutral	Agree	Disagree	Disagree	Undecided	Agree	Undecided	Undecided	Undecided	Agree	Undecided
46	Female		3184	No		No religion		Full time	No	No	No	Yes	No	Yes	Don't know
39	Female		3132	No		Christian (other)		Part time	No	No	No	Yes	No	No	Agree	Text Random Assignment - balanced	Strongly agree	Strongly disagree	Strongly agree	Agree	Agree	Strongly disagree	Strongly agree	Strongly agree	Strongly agree	Disagree
46	Female		3184	No		No religion		Full time	No	Yes	No	Yes	No	No	Don't know	Text Random Assignment - Neutral
21	Male		3030	Mandarin		No religion		Full time	No	No	No	Unsure	No	No	Disagree	Text Random Assignment - balanced	Agree	Undecided	Disagree	Agree	Agree	Agree	Strongly agree	Disagree	Agree	Agree
37	Female		2774	No		Catholic		Full time	No	No	No	Yes	No	Yes	Agree	Text Random Assignment - Neutral	Agree	Disagree	Agree	Agree	Disagree	Agree	Undecided	Disagree	Strongly agree	Disagree
28	Male		2617	No		No religion		Full time	No	No	No	Yes	No	Yes	Disagree	Text Random Assignment - balanced	Strongly agree	Strongly disagree	Strongly agree	Strongly agree	Strongly disagree	Strongly agree	Strongly agree	Strongly agree	Strongly agree	Strongly disagree
23	Female		3053	No		No religion		Full time	No	No	No	Yes	Yes	No	Agree	Text Random Assignment - Neutral	Agree	Undecided	Agree	Agree	Undecided	Disagree	Undecided	Disagree	Agree	Agree
23	Female		2126	No		No religion		Full time	No	No	No	Unsure	No	No	Agree	Text Random Assignment - balanced	Strongly agree	Strongly disagree	Strongly agree	Agree	Disagree	Undecided	Agree	Disagree	Strongly agree	Disagree
37	Female		2022	No		Other (please specify)	Jewish	Part time	No	No	No	Yes	Yes	Yes	Disagree	Text Random Assignment - balanced
58	Male		3030	No		No religion		Full time	No	No	No	Yes	No	Yes	Agree	Text Random Assignment - balanced	Disagree	Agree	Disagree	Agree	Strongly agree	Strongly agree	Strongly agree	Strongly agree	Strongly disagree	Disagree
37	Male		3930	No		No religion		Full time	No	No	No	Yes	Yes	No	Agree	Text Random Assignment - balanced	Agree	Agree	Agree	Agree	Disagree	Disagree	Agree	Undecided	Agree	Undecided
25	Female		2016	No		Catholic		Full time	No	No	No	Unsure	No	No	Don't know	Text Random Assignment - Neutral	Agree	Disagree	Agree	Disagree	Disagree	Undecided	Disagree	Disagree	Strongly agree	Undecided
42	Female		3173	Other (please specify)	Creole	Catholic		Full time	No	Yes	Yes	Yes	No	Yes	Disagree	Text Random Assignment - balanced
48	Male		2570	No		Christian (other)		Full time	Yes	Yes	Yes	Yes	Yes	Yes	Agree	Text Random Assignment - Neutral
22	Male		2041	No		Catholic		Full time	Yes	No	No	Yes	No	No	Agree	Text Random Assignment - balanced	Agree	Agree	Undecided	Agree	Disagree	Agree	Agree	Disagree	Agree	Undecided
24	Female		2193	Cantonese		No religion		Full time	No	No	No	Unsure	No	Yes	Agree	Text Random Assignment - Neutral	Agree	Disagree	Undecided	Agree	Agree	Disagree	Agree	Disagree	Strongly disagree	Agree
54	Male		2761	No		Christian (other)		Full time	No	No	No	Yes	Yes	Yes	Agree	Text Random Assignment - Neutral	Agree	Agree	Agree	Agree	Disagree	Disagree	Disagree	Disagree	Agree	Disagree
49
52	Male		3193	No		Christian (other)		Full time	No	Yes	No	Unsure	Yes	Yes	Disagree	Text Random Assignment - balanced	Agree	Disagree	Agree	Agree	Disagree	Undecided	Agree	Disagree	Agree	Undecided
39	Female		3072	Other (please specify)	Spanish	Catholic		Full time	No	No	No	Unsure	No	No	Don't know	Text Random Assignment - Neutral	Agree	Disagree	Agree	Undecided	Disagree	Disagree	Agree	Disagree	Agree	Agree
49	Female		3030	No		Other (please specify)	Anglican	Full time	Yes	Yes	Yes	Yes	Yes	Yes	Agree	Text Random Assignment - balanced
23	Male		2176	Cantonese		Buddhism		Full time	No	No	No	Yes	No	No	Don't know	Text Random Assignment - balanced	Strongly agree	Strongly agree	Strongly agree	Strongly agree	Strongly agree	Strongly agree	Strongly agree	Strongly agree	Strongly agree	Strongly agree
37	Male		3183	Other (please specify)	Hindi	Other (please specify)	Hindu	Full time	No	No	No	Unsure	No	No	Agree	Text Random Assignment - Neutral	Strongly agree	Disagree	Agree	Disagree	Disagree	Agree	Disagree	Disagree	Strongly agree	Agree
53	Female		3065	No		No religion		Full time	Yes	Yes	No	Yes	No	Yes	Don't know	Text Random Assignment - Neutral	Agree	Disagree	Agree	Agree	Agree	Agree	Undecided	Disagree	Agree	Disagree
32	Female		3183	Other (please specify)	Tagalog	Catholic		Full time	No	No	No	Yes	No	No	Disagree	Text Random Assignment - balanced
56
56	Male		2011	No		Christian (other)		Full time	No	No	No	Unsure	No	No	Don't know	Text Random Assignment - Neutral	Agree	Disagree	Agree	Disagree	Agree	Disagree	Undecided	Disagree	Agree	Disagree
25	Male		2611	No		Christian (other)		Full time	No	Yes	No	Yes	No	No	Don't know	Text Random Assignment - balanced	Agree	Undecided	Undecided	Strongly agree	Disagree	Agree	Agree	Disagree	Strongly agree	Disagree
53	Female		3152	Italian		No religion		Full time	No	No	No	Yes	Yes	Yes	Agree	Text Random Assignment - Neutral	Strongly agree	Disagree	Agree	Agree	Disagree	Disagree	Agree	Disagree	Agree	Disagree
28	Female		2037	Other (please specify)	Persian	Islam		Full time	No	No	No	Unsure	No	No	Don't know	Text Random Assignment - Neutral	Undecided	Agree	Undecided	Disagree	Undecided	Agree	Agree	Undecided	Agree	Undecided
22	Female		2565	Other (please specify)	Konkani	Catholic		Full time	No	No	No	No	Yes	No	Agree	Text Random Assignment - Neutral	Agree	Strongly disagree	Strongly agree	Disagree	Disagree	Disagree	Undecided	Disagree	Strongly agree	Agree
48	Male		3030	No		No religion		Full time	Yes	No	Yes	Unsure	No	Yes	Agree	Text Random Assignment - balanced	Strongly agree	Disagree	Strongly agree	Undecided	Strongly disagree	Strongly disagree	Agree	Disagree	Strongly agree	Strongly agree
23	Male		3337	No		Catholic		Full time	No	No	No	Yes	No	No	Agree	Text Random Assignment - balanced	Strongly agree	Disagree	Strongly agree	Strongly agree	Strongly disagree	Strongly disagree	Agree	Disagree	Strongly agree	Disagree
40	Male		3121	No		No religion		Full time	Yes	No	Yes	Yes	No	Yes	Don't know	Text Random Assignment - balanced	Agree	Disagree	Agree	Agree	Disagree	Agree	Strongly agree	Strongly disagree	Undecided	Disagree
34	Male		2060	No		No religion		Full time	No	No	No	No	No	No	Don't know	Text Random Assignment - Neutral	Undecided	Undecided	Undecided	Undecided	Undecided	Undecided	Undecided	Undecided	Undecided	Undecided
23	Male		3087	No		No religion		Full time	No	No	No	Yes	No	Yes	Agree	Text Random Assignment - balanced	Strongly agree	Strongly disagree	Strongly agree	Strongly agree	Strongly disagree	Agree	Agree	Disagree	Agree	Disagree
24	Male		3028	No		Christian (other)		Full time	No	No	No	Unsure	No	No	Don't know	Text Random Assignment - Neutral	Agree	Strongly disagree	Strongly disagree	Agree	Disagree	Agree	Agree	Disagree	Strongly agree	Undecided
30	Female		2025	Other (please specify)	Persian	No religion		Full time	No	No	Yes	Yes	No	Yes	Agree	Text Random Assignment - Neutral
30	Male		3182	Other (please specify)	Hindi	Other (please specify)	Hindu	Full time	No	No	No	Unsure	No	No	Agree	Text Random Assignment - balanced	Strongly agree	Agree	Strongly agree	Agree	Disagree	Agree	Agree	Undecided	Strongly agree	Agree
39	Female		2021	No		No religion		Full time	Yes	No	Yes	Yes	No	Yes	Agree	Text Random Assignment - Neutral	Agree	Disagree	Agree	Disagree	Disagree	Disagree	Disagree	Disagree	Agree	Agree
39
23	Male		2902	No		No religion		Full time	No	No	No	Yes	No	No	Don't know	Text Random Assignment - Neutral	Undecided	Agree	Undecided	Agree	Agree	Agree	Undecided	Agree	Strongly agree	Disagree
27
23
24	Male		3000	No		Christian (other)		Full time	Yes	Yes	No	Unsure	No	No	Disagree	Text Random Assignment - Neutral
26
40	Female		NSW 2020	Other (please specify)	Farsi	Islam		Full time	No	No	No	Yes	No	No	Agree	Text Random Assignment - Neutral	Strongly agree	Disagree	Strongly agree	Strongly agree	Strongly disagree	Strongly disagree	Undecided	Strongly disagree	Strongly agree	Disagree
23	Male		2141	Arabic		Catholic		Full time	No	No	No	Unsure	No	No	Don't know
27	Male		3006	No		Catholic		Full time	No	No	No	Yes	Yes	Yes	Don't know
25	Female		2068	No		No religion		Full time	No	No	No	Yes	Yes	No	Agree	Text Random Assignment - Neutral
22	Male		3150	Cantonese		No religion		Full time	No	Yes	No	Unsure	No	No	Agree	Text Random Assignment - balanced	Strongly agree	Disagree	Agree	Strongly agree	Strongly disagree	Undecided	Strongly agree	Disagree	Strongly agree	Disagree
23
39	Female		3132	No		Christian (other)		Part time	No	No	No	Yes	No	No	Agree	Text Random Assignment - balanced
31	Female		2041	Other (please specify)	Maltese	Catholic		Full time	No	No	No	Unsure	No	No	Agree	Text Random Assignment - Neutral	Agree	Disagree	Agree	Strongly agree	Strongly disagree	Strongly agree	Disagree	Disagree	Agree	Disagree
25	Male		3032	No		No religion		Full time	No	No	No	Yes	No	Yes	Agree	Text Random Assignment - Neutral	Strongly agree	Strongly agree	Strongly agree	Agree	Strongly disagree	Agree	Strongly agree	Strongly disagree	Agree	Agree
33	Female		3002	No		No religion		Full time	No	No	No	Yes	No	Yes	Agree	Text Random Assignment - balanced	Agree	Undecided	Agree	Strongly agree	Undecided	Agree	Strongly agree	Disagree	Agree	Disagree
49	Female		5118	No		Christian (other)		Full time	No	No	No	Yes	Yes	Yes	Agree
40	Female		2232	No		Catholic		Full time	No	Yes	Yes	Yes	Yes	Yes	Agree	Text Random Assignment - Neutral	Strongly agree	Strongly disagree	Strongly agree	Strongly agree	Strongly agree	Undecided	Disagree	Disagree	Agree	Disagree
40	Male		3143	No		No religion		Full time	No	No	No	Yes	Yes	Yes	Don't know	Text Random Assignment - Neutral	Agree	Disagree	Agree	Undecided	Disagree	Agree	Agree	Disagree	Agree	Disagree
48	Male		3820	No		Catholic		Full time	No	No	No	Yes	Yes	Yes	Agree	Text Random Assignment - balanced	Disagree	Agree	Disagree	Disagree	Undecided	Agree	Strongly agree	Strongly disagree	Strongly agree	Agree
48	Male		2227	No		Catholic		Full time	No	No	No	Yes	Yes	Yes	Agree	Text Random Assignment - balanced	Agree	Disagree	Strongly agree	Agree	Agree	Disagree	Strongly agree	Disagree	Strongly agree	Disagree
33	Female		2300	No		Catholic		Full time	No	No	No	Yes	No	Yes	Don't know	Text Random Assignment - Neutral	Agree	Agree	Agree	Agree	Disagree	Strongly disagree	Agree	Disagree	Agree	Agree
41	Male		4160	No		No religion		Full time	No	No	No	Yes	Yes	Yes	Disagree	Text Random Assignment - Neutral	Agree	Disagree	Agree	Undecided	Disagree	Undecided	Strongly agree	Disagree	Strongly agree	Undecided
64	Male		2234	Greek		Catholic		Full time	No	No	No	Yes	No	Yes	Agree	Text Random Assignment - balanced	Agree	Disagree	Agree	Agree	Disagree	Agree	Agree	Disagree	Agree	Disagree
59	Male		5037	No		No religion		Full time	No	No	No	Yes	Yes	No	Don't know	Text Random Assignment - balanced	Agree	Undecided	Agree	Undecided	Agree	Agree	Agree	Disagree	Undecided	Agree
23	Female		6000	Other (please specify)	Filipino	Other (please specify)	Jehovah's Witness	Full time	Yes	Yes	No	Unsure	No	No	Don't know
56	Female		6021	No		Catholic		Full time	No	No	No	Yes	No	Yes	Agree	Text Random Assignment - Neutral	Agree	Disagree	Agree	Agree	Disagree	Disagree	Agree	Undecided	Strongly agree	Undecided
41	Female		6054	No		Christian (other)		Full time	No	No	No	No	No	Yes	Agree	Text Random Assignment - Neutral
46	Male		4208	No		Christian (other)		Full time	Yes	No	No	Yes	No	Yes	Agree	Text Random Assignment - Neutral	Agree	Disagree	Agree	Agree	Disagree	Agree	Disagree	Undecided	Agree	Undecided
31	Female		3121	No		No religion		Full time	No	No	No	Yes	Yes	Yes	Agree	Text Random Assignment - balanced	Strongly agree	Strongly disagree	Strongly agree	Agree	Strongly disagree	Strongly disagree	Strongly agree	Strongly disagree	Strongly agree	Disagree
52	Female		2130	No		Catholic		Full time	No	No	No	Yes	No	Yes	Disagree	Text Random Assignment - Neutral	Strongly agree	Strongly disagree	Strongly agree	Strongly agree	Agree	Strongly disagree	Agree	Disagree	Agree	Agree
22	Male		3766	No		Christian (other)		Full time	No	No	No	Unsure	No	Yes	Disagree	Text Random Assignment - Neutral	Agree	Agree	Undecided	Disagree	Disagree	Agree	Strongly agree	Disagree	Agree	Undecided
51	Female		3106	No		No religion		Full time	No	No	No	Yes	No	Yes	Agree
49	Male		3806	No		Catholic		Full time	No	No	No	Unsure	No	Yes	Don't know	Text Random Assignment - balanced	Agree	Undecided	Undecided	Undecided	Undecided	Agree	Agree	Disagree	Strongly agree	Agree
31	Male		3177	Other (please specify)	Tamil	Other (please specify)	Hindu	Full time	No	No	No	Yes	No	No	Don't know	Text Random Assignment - Neutral	Strongly agree	Strongly disagree	Strongly agree	Agree	Agree	Disagree	Strongly agree	Disagree	Agree	Undecided
53	Male		3204	No		Christian (other)		Full time	No	No	No	Yes	Yes	Yes	Don't know	Text Random Assignment - balanced	Agree	Undecided	Agree	Agree	Agree	Disagree	Strongly agree	Strongly disagree	Strongly agree	Disagree
59	Male		3136	No		Christian (other)		Full time	No	No	Yes	Unsure	No	Yes	Don't know	Text Random Assignment - balanced	Strongly agree	Strongly agree	Strongly agree	Strongly agree	Strongly agree	Disagree	Strongly agree	Disagree	Strongly agree	Disagree
20	Female		3792	No		No religion		Part time	No	No	No	Yes	No	No	Don't know
38	Female		2121	Arabic		Catholic		Full time	No	No	No	Yes	Yes	Yes	Agree	Text Random Assignment - Neutral	Strongly agree	Disagree	Agree	Agree	Disagree	Disagree	Agree	Disagree	Agree	Disagree
33	Male		3121	No		No religion		Full time	Yes	Yes	No	Unsure	No	No	Don't know	Text Random Assignment - Neutral
36	Female		3941	No		Catholic		Part time	No	No	No	Yes	No	Yes	Don't know	Text Random Assignment - Neutral	Agree	Strongly disagree	Strongly agree	Strongly agree	Disagree	Disagree	Undecided	Disagree	Agree	Agree
51	Male		4228	No		Christian (other)		Full time	No	No	Yes	Yes	No	No	Don't know	Text Random Assignment - balanced	Agree	Disagree	Agree	Undecided	Disagree	Agree	Undecided	Disagree	Agree	Disagree
55	Female		2045	Other (please specify)	vietnamese	No religion		Full time	Yes	No	Yes	Yes	Yes	Yes	Agree	Text Random Assignment - Neutral	Agree	Disagree	Agree	Undecided	Agree	Agree	Agree	Disagree	Strongly agree	Agree
42
31	Female		3053	Other (please specify)	German	No religion		Full time	Yes	Yes	No	Yes	No	Yes	Disagree	Text Random Assignment - Neutral	Agree	Agree	Agree	Strongly disagree	Disagree	Undecided	Strongly agree	Strongly disagree	Strongly agree	Agree
48	Female		2611	No		Catholic		Full time	Yes	Yes	Yes	Yes	Yes	Yes	Agree	Text Random Assignment - balanced
34
49	Female		3181	No		No religion		Full time	Yes	Yes	No	Yes	Yes	Yes	Agree	Text Random Assignment - Neutral	Strongly agree	Strongly disagree	Strongly agree	Strongly agree	Strongly disagree	Disagree	Disagree	Strongly disagree	Strongly agree	Disagree
49	Female		3181	No		No religion		Full time	Yes	Yes	No	Yes	Yes	Yes	Agree	Text Random Assignment - Neutral
65	Male		3004	No		Christian (other)		Full time	Yes	No	No	Yes	No	Yes	Don't know	Text Random Assignment - balanced	Strongly agree	Disagree	Strongly agree	Undecided	Disagree	Undecided	Strongly agree	Disagree	Strongly agree	Undecided
43	Male		3802	Other (please specify)	Marathi	Other (please specify)	Hindu	Full time	No	Yes	No	Yes	No	No	Agree
58	Female		5095	No		Christian (other)		Full time	Yes	No	No	Yes	Yes	Yes	Disagree	Text Random Assignment - balanced	Undecided	Undecided	Agree	Agree	Disagree	Undecided	Agree	Strongly disagree	Strongly agree	Undecided
65	Female		4818	No		Christian (other)		Part time	Yes	No	No	Unsure	No	Yes	Disagree	Text Random Assignment - Neutral
57	Female		3178	No		Christian (other)		Full time	Yes	No	No	Yes	No	Yes	Agree	Text Random Assignment - balanced	Strongly agree	Disagree	Strongly agree	Strongly agree	Disagree	Strongly disagree	Strongly agree	Strongly disagree	Strongly agree	Strongly disagree
52	Female		2207	No		Catholic		Full time	Yes	Yes	Yes	Yes	No	No	Agree	Text Random Assignment - balanced	Agree	Disagree	Agree	Undecided	Disagree	Undecided	Agree	Disagree	Agree	Undecided
20	Male		2340	No		No religion		Full time	No	Yes	No	Yes	Yes	Yes	Agree
43	Female		3015	No		Christian (other)		Part time	Yes	No	No	Unsure	No	No	Disagree	Text Random Assignment - Neutral	Agree	Disagree	Agree	Undecided	Agree	Disagree	Undecided	Agree	Strongly agree	Disagree
51	Male		3029	No		Christian (other)		Full time	No	No	No	Yes	Yes	Yes	Agree	Text Random Assignment - balanced	Agree	Disagree	Agree	Undecided	Strongly agree	Strongly agree	Agree	Disagree	Agree	Undecided
25
44	Male		3064	No		No religion		Full time	No	No	No	Unsure	No	Yes	Don't know	Text Random Assignment - balanced	Agree	Agree	Undecided	Undecided	Disagree	Agree	Agree	Undecided	Strongly agree	Strongly disagree
58	Female		4503	No		No religion		Full time	No	No	No	Yes	No	No	Disagree	Text Random Assignment - balanced	Strongly agree	Disagree	Agree	Agree	Disagree	Disagree	Agree	Disagree	Strongly agree	Disagree
47	Female		3030	No		Catholic		Full time	No	No	No	Yes	No	No	Agree	Text Random Assignment - Neutral	Agree	Disagree	Strongly agree	Strongly agree	Disagree	Disagree	Strongly agree	Disagree	Strongly agree	Undecided
57	Male		2627	No		No religion		Full time	No	No	No	Yes	Yes	Yes	Agree	Text Random Assignment - balanced	Agree	Disagree	Agree	Undecided	Disagree	Agree	Agree	Disagree	Strongly agree	Disagree
57	Male		2627	No		No religion		Full time	No	No	No	Yes	Yes	Yes	Agree	Text Random Assignment - Neutral
44	Male		2352	No		No religion		Full time	No	No	No	Unsure	No	Yes	Don't know	Text Random Assignment - Neutral	Strongly agree	Undecided	Strongly agree	Agree	Disagree	Disagree	Undecided	Disagree	Agree	Undecided
27	Male		3065	No		No religion		Full time	No	No	No	Unsure	No	No	Don't know
45	Male		3804	No		Catholic		Full time	No	No	No	Unsure	No	No	Don't know	Text Random Assignment - balanced
51	Female		2205	No		Catholic		Full time	Yes	Yes	No	Yes	No	Yes	Agree	Text Random Assignment - Neutral	Agree	Strongly disagree	Undecided	Agree	Disagree	Disagree	Disagree	Disagree	Strongly agree	Undecided
40	Female		2223	No		Catholic		Full time	No	No	Yes	Unsure	No	No	Don't know	Text Random Assignment - balanced	Agree	Undecided	Agree	Disagree	Agree	Undecided	Undecided	Undecided	Agree	Disagree
36	Female		3806	Other (please specify)	Korean	Buddhism		Full time	Yes	No	No	Yes	No	Yes	Don't know
56	Male		3024	No		No religion		Full time	No	No	No	Unsure	No	Yes	Don't know	Text Random Assignment - balanced	Agree	Disagree	Agree	Agree	Disagree	Agree	Agree	Disagree	Agree	Disagree
44	Male		2914	No		Catholic		Full time	No	Yes	No	Yes	No	Yes	Disagree	Text Random Assignment - balanced	Agree	Strongly disagree	Agree	Disagree	Undecided	Undecided	Strongly agree	Disagree	Agree	Agree
23
46	Female		3134	No		Christian (other)		Full time	Yes	No	Yes	Yes	Yes	Yes	Disagree	Text Random Assignment - balanced	Agree	Disagree	Agree	Agree	Agree	Agree	Agree	Disagree	Strongly agree	Disagree
47	Male		3031	No		No religion		Part time	Yes	Yes	No	Unsure	Yes	No	Agree
36	Male		3064	Other (please specify)	Punjabi	Other (please specify)	Sikh	Full time	No	Yes	Yes	Unsure	No	Yes	Don't know	Text Random Assignment - Neutral	Disagree	Disagree	Disagree	Agree	Agree	Disagree	Undecided	Disagree	Agree	Disagree
62	Male		3765	No		Catholic		Full time	No	No	No	No	No	Yes	Agree	Text Random Assignment - balanced	Strongly agree	Disagree	Strongly agree	Strongly agree	Disagree	Disagree	Agree	Undecided	Strongly agree	Undecided
62	Male		3765	No		Catholic		Full time	No	Yes	No	No	No	Yes	Agree
36	Female		2611	No		No religion		Full time	Yes	No	No	Yes	Yes	Yes	Agree
27	Female		2017	No		No religion		Full time	No	No	No	Yes	No	No	Disagree	Text Random Assignment - balanced
48	Male		3103	No		No religion		Full time	No	No	Yes	Yes	Yes	Yes	Agree	Text Random Assignment - balanced	Agree	Disagree	Undecided	Agree	Disagree	Agree	Agree	Disagree	Strongly agree	Agree
28	Female		5070	No		No religion		Full time	No	No	No	Yes	Yes	Yes	Don't know
50	Female		3161	Greek		Other (please specify)	Greek Orthodox	Full time	No	No	No	Yes	No	No	Don't know	Text Random Assignment - Neutral	Agree	Disagree	Agree	Agree	Strongly disagree	Strongly disagree	Agree	Strongly disagree	Agree	Strongly disagree
49	Female		3073	No		No religion		Full time	No	No	No	Unsure	No	Yes	Don't know	Text Random Assignment - balanced	Agree	Undecided	Undecided	Undecided	Agree	Undecided	Agree	Undecided	Strongly agree	Undecided
60	Male		3040	No		Christian (other)		Full time	No	No	No	Unsure	No	No	Agree	Text Random Assignment - balanced	Strongly agree	Disagree	Agree	Undecided	Disagree	Disagree	Agree	Disagree	Strongly agree	Disagree
23	Female		3205	No		No religion		Full time	No	No	No	Yes	Yes	Yes	Agree	Text Random Assignment - balanced	Agree	Disagree	Agree	Agree	Disagree	Agree	Agree	Disagree	Agree	Disagree
52	Female		2038	No		No religion		Full time	Yes	Yes	No	Yes	Yes	Yes	Disagree	Text Random Assignment - balanced	Agree	Agree	Agree	Agree	Agree	Strongly agree	Strongly agree	Strongly agree	Strongly agree	Disagree
43	Female		3037	Greek		Other (please specify)	Greek Orthodox	Full time	No	No	No	Unsure	No	No	Agree	Text Random Assignment - balanced	Agree	Undecided	Agree	Agree	Disagree	Undecided	Agree	Agree	Agree	Disagree
64	Female		3107	No		No religion		Part time	Yes	Yes	Yes	Yes	Yes	Yes	Agree
31	Male		3008	Other (please specify)	Hindi	Other (please specify)	hindu	Full time	No	No	No	Yes	No	No	Don't know
40	Female		3101	No		No religion		Full time	Yes	No	No	Yes	Yes	Yes	Don't know	Text Random Assignment - balanced	Agree	Undecided	Agree	Agree	Agree	Agree	Agree	Undecided	Agree	Disagree
50	Female		3161	Greek		Other (please specify)	christian orthodox	Full time	No	No	No	Yes	No	Yes	Agree	Text Random Assignment - balanced	Agree	Disagree	Agree	Agree	Strongly disagree	Strongly disagree	Agree	Strongly disagree	Agree	Strongly disagree
26
52	Male		3130	Other (please specify)	Malay and Tamil	No religion		Full time	Yes	No	Yes	Yes	No	Yes	Agree	Text Random Assignment - Neutral	Strongly agree	Disagree	Agree	Agree	Disagree	Disagree	Strongly agree	Disagree	Strongly agree	Disagree
41	Male		2122	Other (please specify)	japanese	No religion		Full time	No	No	No	Yes	No	Yes	Agree
21	Female		3044	No		No religion		Full time	Yes	Yes	No	Yes	No	Yes	Disagree
40	Female		3191	No		No religion		Full time	Yes	No	No	Yes	Yes	Yes	Don't know
45	Female		3805	No		Catholic		Full time	Yes	Yes	Yes	Yes	Yes	Yes	Disagree	Text Random Assignment - Neutral
56	Male		5075	No		No religion		Full time	No	Yes	No	Yes	Yes	Yes	Agree	Text Random Assignment - balanced	Agree	Disagree	Undecided	Agree	Disagree	Agree	Agree	Disagree	Agree	Disagree
34	Female		3165	No		Other (please specify)	Jain	Part time	Yes	No	No	Yes	Yes	Yes	Agree	Text Random Assignment - Neutral	Agree	Disagree	Agree	Agree	Strongly disagree	Disagree	Agree	Disagree	Strongly agree	Disagree
45	Female		3204	No		No religion		Full time	No	No	No	Unsure	No	No	Agree	Text Random Assignment - Neutral	Undecided	Undecided	Agree	Disagree	Disagree	Agree	Agree	Disagree	Agree	Agree
53	Male		3219	No		Catholic		Full time	No	No	No	Unsure	No	No	Don't know	Text Random Assignment - Neutral
37	Female		3065	No		No religion		Full time	Yes	No	No	Yes	Yes	Yes	Disagree	Text Random Assignment - Neutral	Agree	Disagree	Agree	Agree	Agree	Agree	Agree	Disagree	Strongly agree	Disagree
24	Female		4005	No		No religion		Full time	No	No	No	Yes	Yes	Yes	Disagree
57	Female		3190	No		Christian (other)		Full time	No	No	No	Yes	Yes	Yes	Disagree	Text Random Assignment - balanced	Strongly agree	Disagree	Agree	Agree	Disagree	Undecided	Agree	Disagree	Strongly agree	Disagree
49	Female		3122	No		Catholic		Part time	No	Yes	No	Unsure	No	No	Disagree	Text Random Assignment - Neutral	Agree	Undecided	Undecided	Disagree	Agree	Agree	Agree	Disagree	Strongly agree	Agree
49	Male		3088	No		No religion		Full time	No	No	No	Yes	Yes	Yes	Agree	Text Random Assignment - Neutral
44	Female		3070	Greek		Catholic		Part time	Yes	No	No	Yes	Yes	Yes	Disagree	Text Random Assignment - balanced	Agree	Disagree	Strongly agree	Agree	Disagree	Agree	Agree	Disagree	Strongly agree	Disagree
42	Female		4564	No		Catholic		Full time	Yes	Yes	Yes	Yes	No	Yes	Disagree	Text Random Assignment - balanced	Agree	Disagree	Undecided	Agree	Agree	Undecided	Agree	Disagree	Agree	Disagree
46	Female		4069	No		Catholic		Part time	No	No	No	Yes	Yes	Yes	Don't know	Text Random Assignment - Neutral	Strongly agree	Undecided	Agree	Strongly agree	Disagree	Disagree	Strongly disagree	Strongly disagree	Strongly agree	Disagree
39	Male		3018	No		Christian (other)		Full time	No	No	Yes	Yes	Yes	Yes	Disagree	Text Random Assignment - Neutral	Undecided	Undecided	Undecided	Undecided	Undecided	Undecided	Undecided	Undecided	Undecided	Undecided
37	Male		5037	Other (please specify)	Gujarati	Other (please specify)	Hindu	Full time	No	No	No	Unsure	No	No	Agree	Text Random Assignment - Neutral	Agree	Agree	Strongly agree	Agree	Disagree	Strongly disagree	Undecided	Strongly agree	Agree	Strongly agree
22	Male		6600	Other (please specify)	FILIPINO	Christian (other)		Full time	No	No	No	No	No	No	Don't know
48	Female		3000	Italian		No religion		Full time	No	No	No	Yes	No	Yes	Disagree	Text Random Assignment - balanced
36	Male		3802	Other (please specify)	gujurati,hindi	Other (please specify)	hindu	Full time	No	No	No	Yes	No	No	Don't know	Text Random Assignment - Neutral
23	Male		3089	Other (please specify)	Macedonian	Christian (other)		Full time	No	No	No	Unsure	No	No	Disagree	Text Random Assignment - balanced	Strongly agree	Undecided	Agree	Agree	Disagree	Disagree	Strongly agree	Disagree	Strongly agree	Disagree
23
56	Female		3000	No		Catholic		Full time	No	No	No	No	No	Yes	Don't know
23	Male		3089	Other (please specify)	Macedonian	Christian (other)		Full time	No	No	No	Unsure	No	No	Disagree	Text Random Assignment - balanced
23
54	Male		2041	No		Catholic		Full time	No	No	No	Yes	No	Yes	Agree	Text Random Assignment - Neutral
55	Male		3939	No		Catholic		Full time	No	No	No	Yes	No	No	Don't know	Text Random Assignment - Neutral	Strongly agree	Disagree	Agree	Undecided	Disagree	Agree	Agree	Strongly disagree	Agree	Agree
46	Female		3186	No		Catholic		Part time	No	No	No	Yes	No	Yes	Disagree	Text Random Assignment - Neutral	Agree	Disagree	Agree	Agree	Disagree	Agree	Agree	Disagree	Agree	Strongly disagree
57	Male		4000	No		No religion		Full time	Yes	No	No	Unsure	Yes	Yes	Disagree	Text Random Assignment - balanced	Agree	Disagree	Undecided	Disagree	Strongly disagree	Agree	Strongly agree	Strongly disagree	Strongly agree	Undecided
39	Male		2145	No		No religion		Full time	No	No	No	Yes	Yes	Yes	Agree
45	Male		3148	No		Christian (other)		Full time	No	No	No	Unsure	No	No	Agree	Text Random Assignment - balanced	Agree	Disagree	Agree	Agree	Disagree	Disagree	Agree	Disagree	Strongly agree	Disagree
40	Female		2600	No		Catholic		Full time	No	No	No	No	No	Yes	Agree	Text Random Assignment - balanced
49	Female		3042	No		Catholic		Full time	Yes	No	No	Unsure	No	No	Agree	Text Random Assignment - balanced	Agree	Undecided	Undecided	Disagree	Undecided	Agree	Agree	Disagree	Agree	Disagree
29	Male		3136	Other (please specify)	polish	Catholic		Full time	No	No	No	Yes	No	Yes	Disagree	Text Random Assignment - Neutral	Agree	Undecided	Agree	Agree	Disagree	Agree	Strongly agree	Disagree	Agree	Agree
46	Male		3121	No		No religion		Full time	No	No	No	Unsure	No	No	Don't know	Text Random Assignment - balanced	Agree	Agree	Undecided	Undecided	Agree	Agree	Strongly agree	Undecided	Agree	Undecided
36	Female		5019	No		No religion		Full time	Yes	No	No	Yes	Yes	Yes	Agree	Text Random Assignment - balanced
36	Male		4034	Other (please specify)	Gujarati	Other (please specify)	Hindu	Full time	No	No	No	Yes	No	No	Agree	Text Random Assignment - Neutral	Strongly agree	Disagree	Strongly agree	Strongly agree	Strongly disagree	Strongly disagree	Agree	Disagree	Strongly agree	Disagree
52	Male		4161	No		Christian (other)		Full time	No	No	No	Yes	No	No	Don't know	Text Random Assignment - Neutral	Agree	Disagree	Agree	Agree	Undecided	Undecided	Agree	Disagree	Agree	Undecided
55	Female		3124	Mandarin		Christian (other)		Full time	Yes	No	No	Unsure	No	No	Disagree	Text Random Assignment - Neutral	Disagree	Agree	Agree	Disagree	Agree	Agree	Agree	Disagree	Agree	Undecided
33	Female		2066	Other (please specify)	Russian	Christian (other)		Full time	No	No	No	Unsure	No	No	Don't know	Text Random Assignment - Neutral
22
54	Female		2780	No		Catholic		Full time	No	Yes	No	Yes	No	Yes	Agree	Text Random Assignment - Neutral
31	Male		2154	No		Other (please specify)	Zoroastrian	Full time	No	No	No	Yes	No	No	Agree	Text Random Assignment - Neutral	Strongly agree	Disagree	Agree	Undecided	Agree	Disagree	Undecided	Disagree	Agree	Agree
46	Male		2097	Greek		Christian (other)		Full time	No	No	No	Yes	No	Yes	Agree	Text Random Assignment - balanced
43	Male		3802	Other (please specify)	Marathi	Other (please specify)	Hindu	Full time	No	Yes	No	Yes	No	No	Agree
55	Male		6159	No		No religion		Full time	Yes	Yes	No	No	No	Yes	Agree	Text Random Assignment - balanced	Strongly agree	Disagree	Strongly agree	Disagree	Agree	Agree	Strongly agree	Agree	Strongly agree	Disagree
61	Male		3030	No		No religion		Full time	No	Yes	No	Yes	No	Yes	Disagree	Text Random Assignment - balanced	Agree	Undecided	Undecided	Disagree	Strongly disagree	Agree	Strongly agree	Disagree	Strongly agree	Agree
39	Female		3182	No		Catholic		Full time	No	Yes	No	Yes	Yes	Yes	Agree	Text Random Assignment - balanced	Strongly agree	Strongly disagree	Strongly agree	Strongly agree	Strongly disagree	Strongly agree	Strongly agree	Strongly disagree	Strongly agree	Strongly disagree
68	Male		5159	No		Catholic		Full time	No	No	No	Yes	No	Yes	Agree	Text Random Assignment - balanced	Disagree	Agree	Undecided	Agree	Disagree	Strongly agree	Strongly agree	Strongly disagree	Disagree	Strongly agree
38	Male		3185	No		Other (please specify)	Jewish	Full time	No	No	No	Yes	Yes	Yes	Agree	Text Random Assignment - Neutral	Agree	Disagree	Agree	Undecided	Disagree	Agree	Disagree	Disagree	Agree	Disagree
29	Male		2026	Other (please specify)	French	No religion		Full time	No	No	No	Yes	No	No	Disagree	Text Random Assignment - balanced	Agree	Agree	Disagree	Disagree	Disagree	Agree	Strongly agree	Strongly disagree	Agree	Disagree
28	Male		3015	No		No religion		Full time	No	No	No	Unsure	Yes	No	Don't know	Text Random Assignment - balanced
31	Female		3000	No		No religion		Full time	No	No	No	Yes	No	Yes	Agree	Text Random Assignment - Neutral	Agree	Undecided	Disagree	Disagree	Disagree	Disagree	Undecided	Strongly disagree	Agree	Strongly agree
53	Male		3765	No		Christian (other)		Full time	No	Yes	No	Yes	No	Yes	Don't know
37	Female		3195	No		No religion		Part time	No	No	No	Yes	Yes	Yes	Disagree	Text Random Assignment - Neutral	Agree	Disagree	Agree	Agree	Disagree	Disagree	Agree	Disagree	Strongly agree	Agree
30	Male		3138	No		No religion		Full time	No	No	No	Yes	No	No	Don't know
22	Male		4030	No		No religion		Full time	No	No	Yes	Yes	No	Yes	Agree	Text Random Assignment - Neutral	Agree	Undecided	Agree	Agree	Disagree	Disagree	Undecided	Disagree	Agree	Undecided
53	Female		4075	No		Other (please specify)	anglican	Full time	No	No	No	Unsure	No	Yes	Disagree	Text Random Assignment - Neutral	Agree	Undecided	Undecided	Agree	Strongly disagree	Agree	Strongly agree	Disagree	Strongly agree	Agree
29	Male		3150	Other (please specify)	Bengali	No religion		Full time	No	Yes	No	Yes	Yes	Yes	Disagree	Text Random Assignment - Neutral	Undecided	Undecided	Undecided	Undecided	Undecided	Undecided	Undecided	Undecided	Undecided	Undecided
39	Female		3121	No		Christian (other)		Full time	Yes	No	No	Yes	Yes	Yes	Don't know	Text Random Assignment - Neutral	Strongly agree	Strongly disagree	Strongly agree	Strongly agree	Disagree	Disagree	Undecided	Undecided	Strongly agree	Disagree
43	Female		3216	No		Catholic		Full time	Yes	No	No	Yes	No	No	Agree	Text Random Assignment - balanced
53	Male		3806	No		Catholic		Full time	No	No	Yes	Yes	Yes	Yes	Don't know	Text Random Assignment - balanced
39	Male		3192	No		No religion		Full time	No	No	No	Yes	Yes	Yes	Agree	Text Random Assignment - balanced	Strongly agree	Disagree	Agree	Agree	Strongly disagree	Agree	Disagree	Disagree	Agree	Undecided
34	Male		3032	No		Catholic		Full time	No	No	No	Yes	No	No	Don't know	Text Random Assignment - balanced	Strongly agree	Disagree	Agree	Undecided	Disagree	Agree	Strongly agree	Disagree	Strongly agree	Agree
38	Male		3029	Other (please specify)	Bangali	Islam		Full time	Yes	No	No	Unsure	No	No	Don't know	Text Random Assignment - balanced	Agree	Agree	Agree	Agree	Disagree	Agree	Strongly agree	Disagree	Agree	Agree
44	Female		4032	No		Catholic		Full time	No	No	No	Unsure	Yes	No	Disagree	Text Random Assignment - balanced	Agree	Disagree	Agree	Agree	Undecided	Agree	Strongly agree	Disagree	Agree	Disagree
36	Male		4207	No		Other (please specify)	Natsarym Yasharalyt	Full time	Yes	No	No	Yes	No	Yes	Agree	Text Random Assignment - Neutral	Undecided	Undecided	Undecided	Undecided	Undecided	Undecided	Undecided	Undecided	Undecided	Undecided
34
31	Female		2218	Other (please specify)	Bulgarian	Christian (other)		Full time	No	Yes	No	Yes	Yes	Yes	Agree
58	Male		5041	No		Catholic		Full time	No	No	No	Yes	Yes	Yes	Don't know	Text Random Assignment - balanced	Agree	Agree	Agree	Strongly agree	Agree	Agree	Agree	Strongly agree	Strongly agree	Strongly disagree
37	Female		3218	No		No religion		Part time	No	Yes	Yes	Unsure	No	Yes	Disagree	Text Random Assignment - Neutral	Disagree	Undecided	Undecided	Agree	Agree	Disagree	Agree	Strongly disagree	Strongly agree	Strongly agree
20	Female		3149	No		No religion		Part time	No	No	No	Yes	Yes	Yes	Don't know	Text Random Assignment - Neutral	Strongly agree	Disagree	Strongly agree	Strongly agree	Strongly disagree	Strongly disagree	Disagree	Strongly disagree	Strongly agree	Undecided
24	Male		3184	No		No religion		Full time	No	No	No	Yes	No	Yes	Disagree	Text Random Assignment - balanced	Agree	Disagree	Undecided	Agree	Disagree	Agree	Strongly agree	Strongly disagree	Strongly agree	Disagree
52	Male		2075	No		Catholic		Full time	No	Yes	No	Yes	Yes	Yes	Agree	Text Random Assignment - balanced
59	Male		5172	No		No religion		Full time	No	No	No	Yes	Yes	No	Don't know	Text Random Assignment - Neutral
32	Female		3040	No		Other (please specify)	Pagan	Full time	Yes	Yes	Yes	Yes	Yes	Yes	Agree	Text Random Assignment - balanced	Agree	Disagree	Agree	Agree	Disagree	Agree	Agree	Disagree	Agree	Disagree
32	Female		2206	No		Catholic		Full time	No	No	No	Yes	No	Yes	Agree	Text Random Assignment - balanced	Agree	Disagree	Agree	Agree	Disagree	Disagree	Strongly agree	Disagree	Agree	Agree
21	Male		3161	No		Other (please specify)	Jewish	Full time	No	No	No	Unsure	No	No	Don't know	Text Random Assignment - balanced	Strongly agree	Disagree	Agree	Disagree	Agree	Agree	Strongly agree	Disagree	Strongly agree	Disagree
27	Male		3003	No		No religion		Full time	No	Yes	Yes	Yes	No	No	Agree	Text Random Assignment - balanced	Agree	Disagree	Agree	Agree	Strongly disagree	Undecided	Strongly disagree	Undecided	Disagree	Strongly disagree
38	Female		3193	No		Christian (other)		Full time	No	No	No	Yes	No	Yes	Disagree	Text Random Assignment - Neutral	Strongly agree	Disagree	Agree	Undecided	Disagree	Undecided	Agree	Disagree	Strongly agree	Agree
57	Male		3138	No		Catholic		Full time	Yes	Yes	No	Yes	Yes	Yes	Agree	Text Random Assignment - Neutral	Strongly agree	Disagree	Agree	Agree	Strongly disagree	Agree	Agree	Undecided	Strongly agree	Agree
25	Male		3011	No		No religion		Full time	No	Yes	Yes	No	No	No	Disagree	Text Random Assignment - Neutral
47	Male		4216	No		Christian (other)		Full time	Yes	Yes	No	Yes	No	Yes	Disagree	Text Random Assignment - balanced	Agree	Undecided	Agree	Agree	Disagree	Strongly agree	Strongly agree	Strongly disagree	Agree	Undecided
52	Male		2761	No		No religion		Full time	No	Yes	No	Yes	Yes	Yes	Agree	Text Random Assignment - balanced	Strongly agree	Strongly disagree	Strongly agree	Strongly agree	Strongly disagree	Strongly disagree	Strongly agree	Strongly disagree	Strongly agree	Strongly disagree
46	Female		3102	No		Christian (other)		Full time	Yes	No	No	Yes	Yes	Yes	Disagree	Text Random Assignment - balanced	Agree	Agree	Undecided	Agree	Agree	Strongly agree	Agree	Disagree	Strongly agree	Disagree
38	Male		3037	Other (please specify)	tamil	Other (please specify)	hindu	Full time	No	No	No	Unsure	No	No	Agree	Text Random Assignment - balanced	Agree	Disagree	Agree	Agree	Disagree	Strongly agree	Agree	Agree	Agree	Disagree
49	Male		3038	No		Catholic		Full time	No	No	Yes	Unsure	No	No	Don't know	Text Random Assignment - Neutral	Undecided	Agree	Undecided	Disagree	Undecided	Agree	Strongly disagree	Disagree	Agree	Agree
50	Male		2113	No		Catholic		Full time	No	No	No	Yes	No	No	Disagree	Text Random Assignment - Neutral	Agree	Disagree	Disagree	Agree	Disagree	Disagree	Strongly agree	Disagree	Strongly agree	Disagree
52	Female		3195	No		No religion		Full time	Yes	No	No	Yes	Yes	Yes	Agree	Text Random Assignment - Neutral	Agree	Disagree	Agree	Agree	Disagree	Disagree	Agree	Disagree	Agree	Agree
27	Male		3000	No		Christian (other)		Full time	No	No	Yes	Yes	Yes	Yes	Agree	Text Random Assignment - balanced	Strongly agree	Disagree	Strongly agree	Strongly agree	Undecided	Agree	Agree	Agree	Strongly agree	Agree
25	Male		3198	No		No religion		Full time	Yes	Yes	No	Yes	Yes	Yes	Agree
32	Female		2022	No		Buddhism		Full time	No	No	No	Yes	Yes	Yes	Disagree	Text Random Assignment - balanced	Agree	Disagree	Agree	Agree	Disagree	Undecided	Strongly agree	Disagree	Agree	Disagree
54	Female		3105	Greek		Christian (other)		Full time	No	No	No	Yes	Yes	Yes	Don't know	Text Random Assignment - Neutral	Undecided	Undecided	Agree	Disagree	Agree	Undecided	Agree	Undecided	Strongly agree	Disagree
50	Male		3068	No		No religion		Full time	No	No	No	Yes	No	Yes	Agree	Text Random Assignment - Neutral	Agree	Disagree	Agree	Agree	Disagree	Undecided	Disagree	Disagree	Strongly agree	Agree
39	Male		3192	No		Christian (other)		Full time	No	No	No	Yes	Yes	Yes	Agree	Text Random Assignment - Neutral	Agree	Disagree	Strongly agree	Strongly agree	Undecided	Agree	Disagree	Disagree	Strongly agree	Undecided
29
38	Female		3000	No		No religion		Full time	Yes	No	No	Yes	Yes	Yes	Don't know	Text Random Assignment - balanced	Agree	Disagree	Agree	Undecided	Disagree	Agree	Agree	Agree	Agree	Agree
33	Female		4051	No		No religion		Full time	No	Yes	No	Yes	Yes	Yes	Agree	Text Random Assignment - Neutral	Agree	Disagree	Agree	Undecided	Agree	Disagree	Disagree	Disagree	Agree	Agree
33	Male		7250	No		No religion		Full time	No	No	No	Yes	Yes	Yes	Agree	Text Random Assignment - balanced	Strongly agree	Disagree	Strongly agree	Agree	Undecided	Agree	Strongly agree	Strongly disagree	Agree	Disagree
47	Female		3188	No		No religion		Full time	Yes	No	No	Yes	Yes	Yes	Agree
50
45	Female		4217	No		Catholic		Full time	Yes	Yes	No	Yes	Yes	Yes	Agree	Text Random Assignment - balanced	Strongly agree	Strongly disagree	Strongly agree	Strongly agree	Strongly disagree	Agree	Strongly agree	Strongly disagree	Strongly agree	Disagree
33	Male		3150	Other (please specify)	Chinese dialect	Buddhism		Full time	No	No	No	Unsure	No	No	Agree	Text Random Assignment - Neutral	Strongly agree	Strongly disagree	Strongly agree	Strongly agree	Disagree	Disagree	Undecided	Disagree	Strongly agree	Undecided
44	Male		3181	No		Catholic		Full time	No	Yes	No	Yes	Yes	No	Agree	Text Random Assignment - Neutral	Agree	Agree	Disagree	Disagree	Undecided	Undecided	Strongly disagree	Disagree	Agree	Undecided
57	Male		800	No		No religion		Full time	No	No	No	Yes	Yes	Yes	Don't know
38	Male		3018	No		Christian (other)		Full time	No	No	No	Yes	No	Yes	Disagree	Text Random Assignment - balanced	Agree	Disagree	Strongly agree	Strongly agree	Undecided	Disagree	Agree	Disagree	Strongly agree	Disagree
47	Male		3429	No		Other (please specify)	religious	Full time	No	No	No	Yes	No	Yes	Don't know	Text Random Assignment - Neutral	Undecided	Undecided	Undecided	Undecided	Undecided	Undecided	Undecided	Undecided	Undecided	Undecided
64	Male		3051	No		No religion		Full time	Yes	No	No	Unsure	No	Yes	Don't know
45	Female		3429	No		Catholic		Full time	Yes	No	No	Yes	Yes	Yes	Disagree	Text Random Assignment - balanced	Agree	Disagree	Agree	Agree	Disagree	Disagree	Agree	Disagree	Agree	Disagree
28	Male		3030	Other (please specify)	Polish	Catholic		Full time	No	No	No	Unsure	No	No	Don't know
52	Male		5095	No		Christian (other)		Full time	Yes	Yes	Yes	Unsure	Yes	Yes	Agree	Text Random Assignment - Neutral	Agree	Disagree	Agree	Agree	Disagree	Disagree	Undecided	Disagree	Strongly agree	Agree
43	Male		3163	No		Catholic		Full time	Yes	Yes	No	Unsure	No	No	Agree	Text Random Assignment - Neutral	Agree	Undecided	Agree	Agree	Agree	Agree	Disagree	Undecided	Strongly agree	Undecided
41	Male		3039	No		Catholic		Full time	Yes	Yes	No	Yes	Yes	Yes	Agree	Text Random Assignment - Neutral	Strongly agree	Disagree	Strongly agree	Agree	Disagree	Disagree	Strongly disagree	Strongly disagree	Strongly agree	Strongly agree
43	Male		3163	No		Catholic		Full time	No	Yes	No	Unsure	No	No	Agree	Text Random Assignment - Neutral
28	Male		3161	No		No religion		Full time	No	No	No	Yes	No	Yes	Disagree	Text Random Assignment - Neutral	Strongly agree	Strongly disagree	Agree	Strongly agree	Strongly disagree	Undecided	Agree	Disagree	Agree	Disagree
27	Female		2750	No		No religion		Full time	No	Yes	No	Yes	Yes	Yes	Agree	Text Random Assignment - balanced	Agree	Undecided	Agree	Strongly agree	Agree	Agree	Strongly agree	Agree	Strongly agree	Disagree
43	Male		4070	No		No religion		Full time	No	Yes	No	Yes	Yes	Yes	Agree	Text Random Assignment - balanced	Agree	Disagree	Agree	Agree	Agree	Strongly agree	Disagree	Disagree	Strongly agree	Disagree
52	Female		2099	No		Catholic		Part time	Yes	No	No	Yes	Yes	Yes	Agree	Text Random Assignment - balanced	Agree	Disagree	Agree	Agree	Disagree	Agree	Strongly agree	Disagree	Strongly agree	Disagree
34	Male		3044	Other (please specify)	Telugu	Other (please specify)	Hindu	Full time	No	No	No	Unsure	No	No	Don't know	Text Random Assignment - Neutral
38	Female		3195	No		No religion		Part time	No	No	No	Unsure	No	No	Don't know	Text Random Assignment - balanced	Agree	Undecided	Undecided	Undecided	Agree	Disagree	Undecided	Agree	Strongly agree	Undecided
39	Male		2145	Other (please specify)	Gujarati	Other (please specify)	Hindu	Full time	No	Yes	Yes	Yes	No	No	Agree	Text Random Assignment - balanced
52	Male		3152	No		Christian (other)		Full time	No	No	No	Unsure	No	No	Agree	Text Random Assignment - Neutral	Disagree	Strongly agree	Strongly disagree	Strongly disagree	Strongly agree	Strongly agree	Disagree	Disagree	Strongly agree	Strongly agree
56	Female		3133	No		Christian (other)		Full time	No	No	No	Unsure	No	No	Agree
29	Female		3184	No		No religion		Full time	Yes	No	Yes	Yes	Yes	Yes	Agree	Text Random Assignment - Neutral	Strongly agree	Disagree	Strongly agree	Disagree	Disagree	Disagree	Agree	Disagree	Strongly agree	Undecided
35	Male		3087	No		Catholic		Full time	No	No	No	Yes	Yes	Yes	Disagree	Text Random Assignment - Neutral	Strongly agree	Disagree	Strongly agree	Agree	Strongly disagree	Disagree	Agree	Undecided	Strongly agree	Undecided
40	Male		2145	No		Christian (other)		Full time	Yes	No	No	Yes	Yes	Yes	Agree	Text Random Assignment - Neutral
23	Male		2619	No		Christian (other)		Full time	No	No	No	Yes	Yes	No	Agree	Text Random Assignment - Neutral	Strongly agree	Disagree	Strongly agree	Strongly agree	Disagree	Agree	Undecided	Disagree	Strongly agree	Disagree
55	Female		2487	No		No religion		Full time	No	No	No	Yes	Yes	Yes	Don't know	Text Random Assignment - Neutral	Agree	Disagree	Agree	Undecided	Disagree	Disagree	Undecided	Disagree	Strongly agree	Disagree
29	Male		2138	Cantonese		Christian (other)		Full time	Yes	No	No	Yes	Yes	Yes	Don't know	Text Random Assignment - Neutral	Agree	Agree	Agree	Disagree	Disagree	Disagree	Undecided	Disagree	Undecided	Agree
46
37	Male		3166	No		No religion		Full time	No	No	No	Yes	Yes	Yes	Agree	Text Random Assignment - balanced	Strongly agree	Strongly disagree	Agree	Agree	Agree	Undecided	Undecided	Disagree	Strongly agree	Disagree
45	Female		7009	No		No religion		Full time	Yes	No	No	Unsure	Yes	No	Agree	Text Random Assignment - balanced	Agree	Undecided	Undecided	Undecided	Undecided	Undecided	Undecided	Undecided	Undecided	Undecided
20	Female		3070	No		Catholic		Part time	Yes	No	No	Yes	Yes	Yes	Agree	Text Random Assignment - balanced
46	Male		5086	No		No religion		Full time	No	No	Yes	Yes	Yes	Yes	Agree	Text Random Assignment - balanced	Agree	Disagree	Agree	Strongly agree	Disagree	Agree	Strongly agree	Agree	Strongly agree	Disagree
31	Female		5108	No		Christian (other)		Full time	Yes	No	No	Yes	Yes	No	Don't know	Text Random Assignment - Neutral	Agree	Disagree	Strongly agree	Agree	Agree	Undecided	Undecided	Undecided	Strongly agree	Disagree
45	Male		3131	No		Catholic		Full time	No	No	No	Yes	Yes	Yes	Agree	Text Random Assignment - Neutral	Agree	Disagree	Agree	Strongly agree	Undecided	Undecided	Undecided	Disagree	Agree	Agree
52	Male		3029	No		Other (please specify)	uniting church	Full time	Yes	No	No	No	No	Yes	Disagree	Text Random Assignment - Neutral	Disagree	Agree	Disagree	Agree	Disagree	Agree	Agree	Disagree	Agree	Agree
56	Female		4157	No		Other (please specify)	Panenthiest	Full time	No	No	No	Yes	Yes	Yes	Agree	Text Random Assignment - Neutral	Strongly agree	Strongly disagree	Strongly agree	Agree	Agree	Disagree	Agree	Disagree	Strongly agree	Disagree
32	Female		3142	No		No religion		Full time	Yes	No	No	Yes	Yes	Yes	Don't know	Text Random Assignment - Neutral	Agree	Strongly disagree	Agree	Agree	Disagree	Strongly disagree	Disagree	Disagree	Strongly agree	Undecided
60	Female		4078	No		No religion		Full time	No	No	No	Yes	Yes	Yes	Agree	Text Random Assignment - Neutral	Agree	Disagree	Agree	Undecided	Disagree	Undecided	Agree	Disagree	Strongly agree	Agree
52	Male		2050	No		No religion		Full time	No	No	No	Yes	Yes	Yes	Don't know	Text Random Assignment - Neutral	Agree	Disagree	Agree	Undecided	Disagree	Disagree	Undecided	Disagree	Strongly agree	Undecided
35	Male		3055	Greek		Other (please specify)	Protestant	Full time	Yes	Yes	No	Yes	No	Yes	Agree	Text Random Assignment - Neutral	Agree	Strongly disagree	Agree	Agree	Strongly disagree	Disagree	Agree	Disagree	Agree	Disagree
59	Female		5024	No		Catholic		Full time	Yes	No	No	Yes	Yes	Yes	Agree	Text Random Assignment - balanced	Undecided	Strongly agree	Disagree	Agree	Disagree	Strongly agree	Strongly agree	Disagree	Strongly agree	Strongly agree
25
42	Female		3006	No		No religion		Full time	No	No	No	Unsure	No	Yes	Disagree	Text Random Assignment - balanced	Agree	Disagree	Agree	Undecided	Disagree	Agree	Agree	Undecided	Strongly agree	Undecided
43	Female		3072	Other (please specify)	Serbian	No religion		Full time	No	No	Yes	Unsure	No	Yes	Don't know	Text Random Assignment - Neutral	Agree	Undecided	Agree	Undecided	Disagree	Undecided	Agree	Undecided	Strongly agree	Undecided
53	Male		7170	No		Christian (other)		Full time	Yes	No	No	Unsure	No	No	Don't know
48	Male		3073	No		Christian (other)		Full time	No	Yes	No	Unsure	No	Yes	Don't know	Text Random Assignment - balanced
57	Male		3138	No		Catholic		Full time	No	Yes	No	Yes	No	Yes	Agree	Text Random Assignment - balanced
57	Male		3188	No		No religion		Full time	No	No	No	Yes	Yes	Yes	Agree	Text Random Assignment - Neutral	Agree	Disagree	Agree	Agree	Disagree	Disagree	Disagree	Disagree	Agree	Disagree
56	Male		7030	No		No religion		Full time	Yes	No	No	Yes	No	Yes	Agree	Text Random Assignment - Neutral	Agree	Disagree	Agree	Agree	Disagree	Disagree	Disagree	Disagree	Agree	Agree
45	Female		2000	No		Catholic		Full time	No	No	No	Yes	Yes	Yes	Agree
33	Female		3088	No		No religion		Full time	No	No	No	Yes	Yes	Yes	Agree	Text Random Assignment - balanced
58	Female		3068	No		No religion		Part time	No	No	No	Yes	Yes	Yes	Agree	Text Random Assignment - Neutral	Agree	Agree	Agree	Agree	Agree	Agree	Disagree	Disagree	Agree	Disagree
45	Female		3127	No		Catholic		Full time	Yes	No	Yes	Yes	Yes	Yes	Agree	Text Random Assignment - balanced	Strongly agree	Strongly agree	Strongly agree	Undecided	Disagree	Disagree	Strongly agree	Disagree	Strongly agree	Disagree
36	Male		3058	No		Catholic		Full time	No	No	No	Unsure	No	No	Agree	Text Random Assignment - Neutral
25	Female		2009	No		No religion		Full time	No	No	No	Unsure	No	No	Don't know	Text Random Assignment - Neutral	Agree	Disagree	Agree	Agree	Undecided	Undecided	Undecided	Disagree	Agree	Undecided
52	Male		5016	No		Catholic		Full time	No	No	Yes	Yes	Yes	Yes	Don't know	Text Random Assignment - balanced	Strongly agree	Strongly disagree	Agree	Agree	Disagree	Disagree	Undecided	Disagree	Strongly agree	Disagree
23	Female		3041	No		Christian (other)		Full time	No	No	No	Yes	No	Yes	Disagree	Text Random Assignment - balanced	Agree	Disagree	Agree	Agree	Agree	Strongly agree	Strongly agree	Disagree	Strongly agree	Disagree
45	Male		3168	No		No religion		Full time	No	No	No	Yes	Yes	Yes	Agree	Text Random Assignment - Neutral	Strongly agree	Strongly disagree	Agree	Undecided	Strongly disagree	Strongly disagree	Undecided	Disagree	Agree	Agree
24	Male		3012	No		No religion		Full time	No	Yes	No	Yes	Yes	Yes	Agree	Text Random Assignment - balanced	Strongly agree	Disagree	Agree	Strongly agree	Disagree	Agree	Strongly agree	Disagree	Strongly agree	Disagree
43	Male		2151	No		Christian (other)		Full time	No	No	No	Yes	Yes	Yes	Agree	Text Random Assignment - balanced	Agree	Disagree	Strongly agree	Strongly agree	Agree	Agree	Disagree	Disagree	Strongly agree	Disagree
61	Male		2090	No		Christian (other)		Full time	Yes	No	No	Yes	Yes	Yes	Agree	Text Random Assignment - balanced
50	Male		3015	No		No religion		Full time	No	No	No	Yes	Yes	Yes	Don't know	Text Random Assignment - Neutral	Agree	Disagree	Agree	Undecided	Disagree	Disagree	Undecided	Disagree	Agree	Agree
56	Female		3149	No		No religion		Full time	No	No	No	Yes	Yes	Yes	Agree	Text Random Assignment - Neutral	Agree	Disagree	Agree	Disagree	Agree	Undecided	Agree	Disagree	Disagree	Undecided
51	Female		2118	No		Catholic		Full time	No	No	No	Unsure	No	No	Don't know	Text Random Assignment - balanced	Agree	Disagree	Agree	Agree	Agree	Disagree	Disagree	Disagree	Strongly agree	Disagree
45	Male		3168	No		No religion		Full time	No	No	No	Yes	Yes	Yes	Agree
33	Male		2640	No		No religion		Full time	Yes	Yes	No	Yes	No	Yes	Disagree	Text Random Assignment - Neutral	Agree	Disagree	Strongly agree	Agree	Strongly disagree	Disagree	Agree	Disagree	Agree	Undecided
43	Female		2035	No		No religion		Full time	No	No	No	Yes	No	Yes	Agree	Text Random Assignment - balanced	Agree	Undecided	Agree	Undecided	Disagree	Disagree	Agree	Disagree	Agree	Undecided
47	Male		3030	No		Catholic		Full time	No	Yes	No	Yes	No	Yes	Don't know	Text Random Assignment - Neutral	Agree	Disagree	Strongly agree	Agree	Disagree	Strongly disagree	Undecided	Disagree	Strongly agree	Undecided
47	Male		4300	No		Catholic		Full time	No	No	No	Unsure	Yes	Yes	Don't know	Text Random Assignment - Neutral	Strongly agree	Strongly disagree	Strongly agree	Undecided	Disagree	Strongly disagree	Undecided	Strongly disagree	Strongly agree	Strongly agree
51	Male		3134	No		Christian (other)		Full time	Yes	No	Yes	No	No	Yes	Agree	Text Random Assignment - balanced	Strongly agree	Strongly disagree	Agree	Agree	Agree	Disagree	Agree	Disagree	Strongly agree	Undecided
55	Male		2250	No		Catholic		Full time	Yes	No	No	Yes	Yes	Yes	Agree	Text Random Assignment - Neutral	Strongly agree	Strongly disagree	Agree	Undecided	Strongly disagree	Disagree	Agree	Undecided	Strongly agree	Disagree
48	Female		3040	No		Christian (other)		Full time	No	No	No	Yes	No	No	Don't know	Text Random Assignment - Neutral	Strongly agree	Strongly disagree	Agree	Agree	Disagree	Disagree	Undecided	Disagree	Strongly agree	Undecided
29	Female		3072	Other (please specify)	Hindi & Punjabi	Other (please specify)	Hinduism	Full time	No	No	No	Yes	No	No	Agree	Text Random Assignment - balanced	Strongly agree	Disagree	Strongly agree	Agree	Disagree	Strongly disagree	Undecided	Disagree	Agree	Disagree
43	Female		3046	No		No religion		Full time	Yes	No	No	Yes	Yes	Yes	Don't know	Text Random Assignment - balanced	Agree	Disagree	Agree	Agree	Undecided	Agree	Strongly agree	Strongly agree	Strongly agree	Disagree
50	Male		3095	No		Catholic		Full time	Yes	Yes	No	Yes	Yes	No	Agree	Text Random Assignment - Neutral
42	Male		3429	No		No religion		Full time	No	No	No	Yes	Yes	Yes	Agree	Text Random Assignment - Neutral	Strongly agree	Disagree	Strongly agree	Agree	Disagree	Disagree	Undecided	Disagree	Agree	Disagree
34	Female		3975	No		No religion		Full time	Yes	Yes	No	Yes	Yes	Yes	Agree	Text Random Assignment - balanced	Strongly agree	Disagree	Undecided	Agree	Agree	Agree	Agree	Agree	Agree	Disagree
27	Male		6052	Mandarin		Catholic		Full time	No	No	No	Unsure	No	No	Disagree	Text Random Assignment - balanced	Agree	Agree	Agree	Agree	Agree	Agree	Agree	Agree	Agree	Agree
21	Male		3131	No		No religion		Full time	No	No	No	Yes	No	No	Don't know	Text Random Assignment - balanced	Agree	Disagree	Strongly agree	Agree	Disagree	Disagree	Strongly agree	Disagree	Strongly agree	Undecided
46	Male		7018	No		No religion		Full time	No	No	No	Yes	Yes	Yes	Agree	Text Random Assignment - balanced	Agree	Disagree	Strongly agree	Strongly agree	Disagree	Disagree	Agree	Disagree	Strongly agree	Disagree
30	Female		3000	No		No religion		Full time	No	Yes	No	Unsure	No	Yes	Agree	Text Random Assignment - balanced
59	Male		6019	No		No religion		Full time	Yes	No	No	Yes	Yes	Yes	Agree	Text Random Assignment - balanced	Strongly agree	Disagree	Agree	Undecided	Disagree	Disagree	Disagree	Undecided	Strongly agree	Undecided
33	Female		3183	No		No religion		Full time	No	Yes	Yes	Yes	Yes	Yes	Agree	Text Random Assignment - balanced
53	Male		4502	No		Other (please specify)	anglican	Full time	No	No	No	Yes	No	No	Don't know	Text Random Assignment - balanced	Undecided	Disagree	Undecided	Agree	Disagree	Agree	Agree	Disagree	Agree	Disagree
52	Female		3000	No		No religion		Full time	No	No	No	Yes	Yes	Yes	Agree
29	Male		3146	No		Buddhism		Full time	No	No	No	Yes	Yes	Yes	Agree	Text Random Assignment - Neutral
50	Male		4500	No		Catholic		Full time	Yes	No	No	Yes	No	Yes	Disagree	Text Random Assignment - balanced	Strongly agree	Strongly disagree	Strongly agree	Agree	Undecided	Disagree	Strongly agree	Disagree	Strongly agree	Undecided
38	Male		6051	No		No religion		Full time	No	No	No	Yes	No	Yes	Don't know	Text Random Assignment - Neutral	Agree	Disagree	Undecided	Undecided	Agree	Strongly disagree	Agree	Undecided	Strongly agree	Disagree
23	Female		2761	Other (please specify)	Tagalog	Catholic		Full time	Yes	No	No	Unsure	No	No	Agree	Text Random Assignment - Neutral
24	Female		4020	No		No religion		Full time	No	Yes	No	Yes	Yes	Yes	Agree	Text Random Assignment - balanced	Agree	Undecided	Disagree	Undecided	Disagree	Agree	Agree	Strongly disagree	Strongly agree	Agree
47	Male		3207	No		Christian (other)		Full time	No	No	No	Yes	No	Yes	Agree	Text Random Assignment - Neutral	Agree	Strongly disagree	Agree	Agree	Disagree	Disagree	Disagree	Strongly disagree	Agree	Agree
51	Female		2066	Italian		Catholic		Full time	No	No	No	Unsure	No	No	Agree	Text Random Assignment - Neutral	Disagree	Agree	Undecided	Undecided	Agree	Disagree	Disagree	Undecided	Agree	Disagree
54	Female		2081	No		No religion		Full time	No	No	No	Yes	Yes	Yes	Don't know	Text Random Assignment - balanced	Agree	Disagree	Agree	Agree	Disagree	Disagree	Agree	Disagree	Agree	Disagree
54	Female		3350	No		Catholic		Full time	No	Yes	No	Yes	No	Yes	Agree	Text Random Assignment - Neutral	Agree	Disagree	Agree	Agree	Disagree	Disagree	Disagree	Disagree	Agree	Disagree
49	Female		4160	No		Christian (other)		Full time	No	No	No	Yes	Yes	Yes	Agree	Text Random Assignment - Neutral	Strongly agree	Strongly agree	Strongly agree	Strongly agree	Strongly agree	Disagree	Agree	Disagree	Strongly agree	Disagree
42	Male		3163	No		No religion		Full time	Yes	No	No	Yes	No	Yes	Agree
29	Female		3183	No		No religion		Full time	No	No	No	Yes	No	Yes	Agree	Text Random Assignment - balanced	Strongly agree	Disagree	Strongly agree	Strongly agree	Undecided	Disagree	Strongly agree	Disagree	Strongly agree	Disagree
40	Female		2155	No		No religion		Full time	No	No	Yes	Yes	Yes	Yes	Disagree	Text Random Assignment - balanced
37	Female		2913	No		Christian (other)		Full time	No	No	No	Yes	Yes	No	Agree	Text Random Assignment - balanced	Agree	Disagree	Agree	Undecided	Agree	Undecided	Undecided	Disagree	Strongly agree	Disagree
58	Female		3199	No		Christian (other)		Full time	Yes	No	No	Yes	Yes	No	Agree	Text Random Assignment - Neutral	Undecided	Agree	Disagree	Disagree	Strongly agree	Strongly agree	Disagree	Agree	Strongly agree	Strongly agree
58	Female		3199	No		Christian (other)		Full time	Yes	No	No	Yes	Yes	No	Don't know	Text Random Assignment - Neutral
56	Female		6169	No		Catholic		Full time	Yes	Yes	No	Yes	Yes	Yes	Agree	Text Random Assignment - balanced	Strongly agree	Disagree	Undecided	Strongly agree	Strongly disagree	Agree	Strongly agree	Disagree	Strongly agree	Strongly disagree
47	Female		4157	No		No religion		Full time	Yes	No	No	Yes	Yes	Yes	Disagree	Text Random Assignment - balanced	Strongly agree	Strongly disagree	Strongly agree	Strongly agree	Strongly disagree	Agree	Strongly agree	Strongly disagree	Strongly agree	Strongly disagree
59	Male		4035	No		Christian (other)		Full time	No	No	No	No	Yes	Yes	Disagree	Text Random Assignment - Neutral	Agree	Disagree	Agree	Agree	Disagree	Disagree	Disagree	Disagree	Agree	Disagree
49	Male		2486	No		Catholic		Full time	No	No	No	Yes	No	Yes	Agree	Text Random Assignment - balanced	Agree	Undecided	Undecided	Agree	Agree	Agree	Strongly agree	Agree	Agree	Strongly disagree
43	Female		2219	Greek		Christian (other)		Full time	No	Yes	No	Unsure	No	Yes	Agree	Text Random Assignment - Neutral
50	Female		2830	No		Catholic		Full time	Yes	No	No	Yes	Yes	Yes	Agree	Text Random Assignment - Neutral	Agree	Disagree	Undecided	Disagree	Disagree	Agree	Undecided	Disagree	Agree	Agree
57	Male		6149	No		No religion		Full time	No	No	No	Yes	No	Yes	Agree	Text Random Assignment - Neutral	Strongly agree	Disagree	Strongly agree	Undecided	Agree	Disagree	Disagree	Disagree	Strongly agree	Disagree
51	Male		3149	No		No religion		Full time	No	No	No	Yes	No	Yes	Agree	Text Random Assignment - balanced	Agree	Undecided	Agree	Agree	Disagree	Agree	Agree	Disagree	Agree	Disagree
44	Male		5051	No		Christian (other)		Full time	No	Yes	No	Yes	Yes	Yes	Agree	Text Random Assignment - Neutral	Agree	Disagree	Undecided	Disagree	Agree	Disagree	Undecided	Undecided	Agree	Agree
37	Male		3690	No		Christian (other)		Full time	No	No	No	Yes	No	Yes	Don't know	Text Random Assignment - Neutral	Strongly agree	Disagree	Strongly agree	Agree	Agree	Disagree	Undecided	Disagree	Agree	Agree
39	Male		2600	No		Christian (other)		Full time	No	No	No	Yes	No	Yes	Disagree	Text Random Assignment - balanced	Undecided	Agree	Undecided	Undecided	Disagree	Strongly agree	Agree	Disagree	Strongly agree	Disagree
40	Male		3006	Other (please specify)	arabic	Christian (other)		Full time	No	Yes	Yes	Yes	Yes	No	Disagree	Text Random Assignment - Neutral	Strongly agree	Strongly agree	Agree	Strongly agree	Agree	Agree	Agree	Disagree	Disagree	Disagree
37	Male		5154	No		Christian (other)		Full time	No	No	No	Yes	Yes	Yes	Don't know	Text Random Assignment - Neutral	Agree	Disagree	Agree	Agree	Disagree	Disagree	Agree	Disagree	Agree	Undecided
49	Male		2230	No		Christian (other)		Full time	Yes	No	No	Yes	No	No	Agree	Text Random Assignment - balanced	Strongly agree	Disagree	Agree	Agree	Agree	Agree	Undecided	Disagree	Agree	Disagree
49	Male		2217	No		Catholic		Full time	No	No	No	Unsure	No	No	Agree	Text Random Assignment - balanced	Agree	Undecided	Agree	Agree	Agree	Disagree	Disagree	Agree	Agree	Undecided
31	Female		3101	No		No religion		Part time	No	No	No	Yes	No	No	Agree	Text Random Assignment - Neutral
46	Female		3186	No		Catholic		Part time	No	No	No	Yes	No	Yes	Disagree	Text Random Assignment - Neutral
49	Female		3178	Other (please specify)	Konkani	Catholic		Full time	No	No	No	Yes	No	No	Agree	Text Random Assignment - balanced	Agree	Disagree	Agree	Agree	Undecided	Undecided	Undecided	Undecided	Agree	Undecided
31	Female		3088	No		Catholic		Full time	Yes	No	No	Yes	Yes	Yes	Don't know	Text Random Assignment - Neutral	Agree	Disagree	Agree	Agree	Disagree	Agree	Agree	Disagree	Agree	Undecided
62	Male		2122	No		Christian (other)		Full time	No	No	No	Yes	No	Yes	Agree	Text Random Assignment - balanced	Strongly agree	Disagree	Agree	Undecided	Strongly disagree	Disagree	Agree	Strongly disagree	Strongly agree	Undecided
33	Female		3023	Other (please specify)	Sinhalese	Catholic		Full time	No	Yes	Yes	Yes	Yes	Yes	Agree	Text Random Assignment - balanced	Agree	Agree	Agree	Agree	Disagree	Agree	Strongly disagree	Agree	Agree	Disagree
51	Male		2148	No		Christian (other)		Full time	Yes	No	No	Unsure	Yes	Yes	Don't know	Text Random Assignment - Neutral
59	Male		2534	No		No religion		Full time	No	No	No	Yes	Yes	Yes	Agree	Text Random Assignment - balanced
38	Female		3056	No		No religion		Full time	No	No	No	Yes	No	Yes	Agree	Text Random Assignment - Neutral	Strongly agree	Strongly disagree	Agree	Disagree	Disagree	Disagree	Disagree	Disagree	Strongly agree	Agree
40	Male		3044	No		No religion		Full time	Yes	No	Yes	Unsure	Yes	Yes	Agree	Text Random Assignment - balanced	Strongly agree	Disagree	Agree	Strongly disagree	Agree	Disagree	Undecided	Disagree	Strongly agree	Agree
48	Female		3102	Italian		Catholic		Full time	No	Yes	No	Unsure	No	Yes	Agree	Text Random Assignment - balanced
34	Female		5085	No		No religion		Full time	Yes	No	No	Yes	Yes	Yes	Agree	Text Random Assignment - Neutral	Agree	Disagree	Agree	Undecided	Undecided	Disagree	Agree	Undecided	Strongly agree	Agree
38	Female		6000	No		No religion		Full time	No	No	No	No	No	No	Don't know	Text Random Assignment - Neutral	Disagree	Agree	Undecided	Disagree	Agree	Disagree	Undecided	Disagree	Agree	Agree
35	Male		3205	No		Christian (other)		Full time	No	Yes	No	Yes	No	No	Agree	Text Random Assignment - balanced	Strongly agree	Strongly disagree	Strongly agree	Undecided	Strongly agree	Disagree	Undecided	Disagree	Strongly agree	Disagree
27	Female		6164	No		Christian (other)		Full time	Yes	No	No	Yes	Yes	Yes	Agree
51	Female		3186	No		No religion		Full time	Yes	Yes	No	Yes	Yes	Yes	Don't know	Text Random Assignment - balanced	Agree	Disagree	Agree	Agree	Agree	Disagree	Strongly agree	Disagree	Agree	Disagree
58	Male		6155	No		Christian (other)		Full time	Yes	Yes	No	Yes	No	Yes	Agree	Text Random Assignment - Neutral	Strongly agree	Disagree	Strongly agree	Strongly agree	Strongly agree	Disagree	Undecided	Strongly disagree	Strongly agree	Undecided
58	Male		6155	No		Christian (other)		Full time	Yes	Yes	No	Yes	No	Yes	Agree	Text Random Assignment - Neutral
48	Female		2034	Other (please specify)	Romanian	Christian (other)		Full time	No	Yes	No	Yes	Yes	Yes	Agree	Text Random Assignment - Neutral	Agree	Disagree	Agree	Undecided	Agree	Disagree	Undecided	Disagree	Strongly agree	Disagree
33	Male		4053	No		Catholic		Full time	No	No	No	Unsure	No	No	Agree	Text Random Assignment - Neutral
26	Male		3153	No		Other (please specify)	orthodox	Full time	No	No	No	Yes	No	No	Disagree	Text Random Assignment - balanced	Agree	Disagree	Agree	Undecided	Agree	Agree	Strongly agree	Disagree	Agree	Agree
26	Female		6155	No		Other (please specify)	Orthodox	Full time	Yes	Yes	No	Yes	No	Yes	Disagree	Text Random Assignment - balanced	Agree	Disagree	Agree	Disagree	Agree	Agree	Agree	Strongly disagree	Strongly agree	Agree
38	Female		4226	No		Christian (other)		Full time	No	No	No	Yes	No	Yes	Agree	Text Random Assignment - Neutral	Agree	Disagree	Undecided	Agree	Agree	Undecided	Agree	Agree	Strongly agree	Undecided
27	Male		4066	No		Other (please specify)	Atheist	Full time	Yes	No	No	Yes	Yes	Yes	Agree	Text Random Assignment - Neutral	Agree	Disagree	Agree	Agree	Strongly disagree	Disagree	Undecided	Disagree	Undecided	Agree
38	Female		4053	No		No religion		Full time	No	No	No	Yes	Yes	Yes	Agree	Text Random Assignment - Neutral	Agree	Disagree	Agree	Agree	Strongly disagree	Strongly disagree	Undecided	Strongly disagree	Strongly agree	Undecided
55	Male		3144	No		Catholic		Full time	No	No	No	Unsure	No	No	Agree	Text Random Assignment - balanced	Agree	Undecided	Disagree	Disagree	Agree	Agree	Agree	Disagree	Strongly agree	Agree
32	Female		3340	No		Catholic		Full time	Yes	No	No	Yes	Yes	Yes	Disagree	Text Random Assignment - balanced	Agree	Agree	Strongly agree	Strongly agree	Strongly disagree	Disagree	Strongly agree	Disagree	Strongly agree	Undecided
35	Female		2768	Other (please specify)	hindi	Other (please specify)	hinduism	Full time	No	No	No	Unsure	No	No	Agree
51	Male		4130	No		Christian (other)		Full time	Yes	No	No	Yes	Yes	Yes	Disagree	Text Random Assignment - balanced	Agree	Disagree	Agree	Agree	Disagree	Agree	Agree	Disagree	Agree	Undecided
41	Female		3082	No		Catholic		Full time	No	No	No	Yes	No	Yes	Don't know	Text Random Assignment - balanced	Disagree	Agree	Disagree	Strongly disagree	Agree	Disagree	Agree	Strongly agree	Strongly agree	Strongly disagree
26	Female		3011	No		No religion		Part time	No	No	Yes	Unsure	Yes	Yes	Don't know	Text Random Assignment - Neutral	Strongly agree	Disagree	Agree	Strongly agree	Disagree	Undecided	Agree	Disagree	Strongly agree	Undecided
53	Male		5081	No		No religion		Full time	No	No	No	Yes	Yes	No	Don't know	Text Random Assignment - balanced	Strongly agree	Strongly disagree	Strongly agree	Agree	Strongly disagree	Strongly disagree	Disagree	Disagree	Strongly agree	Disagree
37	Female		3155	No		No religion		Full time	No	No	Yes	Unsure	No	Yes	Agree	Text Random Assignment - balanced	Undecided	Undecided	Disagree	Agree	Strongly agree	Agree	Undecided	Undecided	Strongly agree	Strongly disagree
42	Female		4502	No		No religion		Part time	No	No	No	Yes	Yes	Yes	Don't know	Text Random Assignment - balanced	Strongly agree	Disagree	Agree	Undecided	Disagree	Disagree	Strongly agree	Disagree	Agree	Disagree
26	Female		6155	No		Other (please specify)	Orthodox	Full time	Yes	Yes	No	Yes	No	No	Disagree	Text Random Assignment - Neutral
54	Male		2904	No		No religion		Full time	Yes	No	No	Unsure	No	No	Agree	Text Random Assignment - Neutral	Undecided	Undecided	Undecided	Undecided	Undecided	Undecided	Undecided	Undecided	Undecided	Undecided
24
39	Male		4034	No		No religion		Full time	No	No	No	No	Yes	No	Disagree	Text Random Assignment - Neutral	Agree	Disagree	Agree	Undecided	Strongly disagree	Undecided	Agree	Strongly disagree	Strongly agree	Undecided
29	Female		2010	No		No religion		Full time	Yes	No	No	Yes	No	No	Agree	Text Random Assignment - balanced	Agree	Disagree	Agree	Undecided	Disagree	Undecided	Strongly agree	Undecided	Agree	Undecided
43	Female		2067	No		Catholic		Full time	No	No	No	Yes	No	Yes	Don't know	Text Random Assignment - Neutral	Agree	Disagree	Disagree	Agree	Undecided	Disagree	Disagree	Disagree	Strongly agree	Agree
37	Male		3169	Other (please specify)	Spanish	Christian (other)		Full time	No	No	No	Unsure	No	Yes	Agree	Text Random Assignment - Neutral	Strongly agree	Undecided	Agree	Undecided	Disagree	Disagree	Agree	Disagree	Strongly agree	Disagree
47	Female		6065	No		Catholic		Full time	Yes	Yes	No	Unsure	No	No	Agree	Text Random Assignment - Neutral	Disagree	Agree	Undecided	Undecided	Agree	Agree	Undecided	Agree	Agree	Disagree
47	Female		2570	Other (please specify)	german	Other (please specify)	orthodox	Full time	Yes	No	No	Yes	Yes	Yes	Agree	Text Random Assignment - Neutral
29	Male		3205	Arabic		Catholic		Full time	No	Yes	Yes	Yes	Yes	Yes	Agree	Text Random Assignment - Neutral	Agree	Agree	Undecided	Undecided	Agree	Disagree	Agree	Undecided	Agree	Agree
65	Male		2621	No		No religion		Full time	No	No	No	No	Yes	Yes	Agree	Text Random Assignment - Neutral	Undecided	Agree	Disagree	Disagree	Undecided	Agree	Undecided	Undecided	Agree	Strongly agree
45	Male		3175	Other (please specify)	Malayalam	Christian (other)		Full time	Yes	Yes	No	Unsure	No	No	Agree
27	Male		3146	No		Catholic		Full time	No	No	No	Unsure	No	No	Agree	Text Random Assignment - Neutral	Undecided	Undecided	Agree	Agree	Undecided	Agree	Disagree	Disagree	Agree	Disagree
47	Male		3134	No		No religion		Full time	Yes	No	No	Yes	No	Yes	Agree	Text Random Assignment - balanced	Strongly agree	Disagree	Strongly agree	Agree	Strongly disagree	Strongly disagree	Agree	Strongly disagree	Strongly agree	Strongly disagree
47	Male		5098	No		No religion		Full time	No	No	No	Yes	Yes	Yes	Agree	Text Random Assignment - Neutral	Agree	Disagree	Agree	Disagree	Disagree	Disagree	Undecided	Disagree	Strongly agree	Agree
34	Male		3037	Other (please specify)	Tamil	Other (please specify)	Hindu	Full time	No	No	No	Yes	No	No	Agree	Text Random Assignment - Neutral	Agree	Undecided	Undecided	Disagree	Undecided	Agree	Strongly agree	Undecided	Agree	Undecided
54	Female		2913	No		Christian (other)		Full time	No	No	No	Unsure	No	No	Agree	Text Random Assignment - balanced	Agree	Disagree	Agree	Agree	Agree	Undecided	Disagree	Undecided	Agree	Disagree
47	Male		2761	No		Catholic		Full time	No	No	No	Yes	No	Yes	Don't know	Text Random Assignment - balanced	Agree	Disagree	Agree	Agree	Undecided	Agree	Strongly agree	Disagree	Strongly agree	Undecided
58	Female		3030	No		Catholic		Full time	No	Yes	No	Yes	Yes	No	Agree	Text Random Assignment - balanced	Agree	Disagree	Undecided	Agree	Agree	Agree	Agree	Disagree	Undecided	Disagree
32	Female		3975	Other (please specify)	tamil	Catholic		Full time	Yes	No	No	Yes	No	Yes	Agree	Text Random Assignment - Neutral	Strongly agree	Strongly disagree	Strongly agree	Strongly agree	Strongly agree	Disagree	Undecided	Strongly disagree	Strongly agree	Undecided
59	Male		3140	No		No religion		Full time	No	No	No	Yes	Yes	Yes	Agree	Text Random Assignment - balanced	Strongly agree	Strongly disagree	Strongly agree	Strongly agree	Strongly disagree	Disagree	Strongly agree	Strongly disagree	Strongly agree	Strongly disagree
58	Male		6155	No		Christian (other)		Full time	Yes	Yes	No	Yes	No	Yes	Agree	Text Random Assignment - Neutral
45	Male		3056	No		No religion			Yes	No	No	Yes	Yes	No	Agree	Text Random Assignment - balanced	Agree	Undecided	Agree	Strongly agree	Strongly agree	Undecided	Agree	Disagree	Agree	Disagree
27
24	Female		4020	No		No religion		Full time	No	No	No	Yes	Yes	Yes	Agree	Text Random Assignment - balanced
52	Male		3163	No		No religion		Full time	No	No	Yes	Yes	No	Yes	Agree	Text Random Assignment - balanced	Undecided	Agree	Undecided	Disagree	Disagree	Agree	Strongly agree	Disagree	Strongly agree	Agree
50	Female		2039	No		No religion		Full time	No	Yes	No	Unsure	No	No	Don't know
50	Male		2580	No		Christian (other)		Full time	Yes	No	No	Yes	Yes	Yes	Disagree	Text Random Assignment - balanced	Agree	Agree	Agree	Agree	Agree	Agree	Agree	Agree	Agree	Agree
46	Female		3015	No		No religion		Full time	No	No	No	Yes	Yes	Yes	Agree	Text Random Assignment - balanced	Agree	Disagree	Agree	Undecided	Disagree	Agree	Agree	Disagree	Agree	Disagree
39	Male		2611	No		No religion		Full time	No	No	Yes	Yes	Yes	Yes	Agree
41	Male		5022	Other (please specify)	serbian	Christian (other)		Full time	No	No	No	Unsure	No	No	Agree	Text Random Assignment - balanced	Undecided	Undecided	Undecided	Undecided	Undecided	Undecided	Undecided	Undecided	Undecided	Undecided
53	Male		4165	No		Christian (other)		Full time	Yes	Yes	Yes	Yes	No	No	Agree	Text Random Assignment - balanced	Agree	Agree	Agree	Agree	Agree	Agree	Agree	Agree	Agree	Agree
26	Male		3219	No		Catholic		Full time	No	No	No	Yes	Yes	Yes	Don't know	Text Random Assignment - Neutral	Strongly agree	Strongly disagree	Strongly agree	Agree	Disagree	Undecided	Undecided	Disagree	Strongly agree	Undecided
32	Male		3173	Other (please specify)	Malayalam	Other (please specify)	Hinduism	Full time	No	No	No	Yes	No	No	Agree
45	Male		7171	No		No religion		Full time	No	Yes	No	Unsure	No	Yes	Agree	Text Random Assignment - balanced	Agree	Disagree	Agree	Agree	Undecided	Disagree	Undecided	Disagree	Agree	Undecided
45	Female		3182	No		No religion		Full time	No	No	No	Yes	No	No	Agree	Text Random Assignment - balanced	Undecided	Undecided	Undecided	Undecided	Undecided	Undecided	Undecided	Undecided	Undecided	Undecided
44	Female		3166	Greek		Christian (other)		Full time	No	Yes	No	Yes	No	No	Agree	Text Random Assignment - Neutral	Agree	Disagree	Agree	Undecided	Disagree	Disagree	Undecided	Disagree	Strongly agree	Undecided
41
56	Male		2600	No		No religion		Full time	No	Yes	No	Unsure	No	No	Don't know	Text Random Assignment - balanced	Agree	Disagree	Undecided	Disagree	Disagree	Agree	Agree	Disagree	Strongly agree	Undecided
61	Female		3658	No		Catholic		Full time	No	No	Yes	Yes	Yes	No	Agree	Text Random Assignment - Neutral
52	Male		2088	No		Catholic		Full time	Yes	No	No	Yes	Yes	Yes	Agree	Text Random Assignment - Neutral	Agree	Disagree	Agree	Strongly agree	Disagree	Disagree	Undecided	Disagree	Undecided	Undecided
62	Male		2031	No		No religion		Full time	No	No	No	Yes	Yes	No	Agree	Text Random Assignment - Neutral	Agree	Disagree	Agree	Agree	Strongly disagree	Disagree	Undecided	Strongly disagree	Strongly agree	Strongly disagree
35	Male		4152	No		Catholic		Full time	No	No	No	Yes	Yes	Yes	Agree	Text Random Assignment - balanced	Strongly agree	Disagree	Strongly agree	Strongly agree	Disagree	Disagree	Disagree	Disagree	Disagree	Disagree
41	Male		2154	Other (please specify)	Indian	Other (please specify)	Hindu	Full time	No	Yes	No	Yes	No	No	Agree	Text Random Assignment - balanced	Strongly agree	Disagree	Agree	Strongly agree	Strongly disagree	Disagree	Disagree	Disagree	Strongly agree	Undecided
56	Female		4157	No		No religion		Full time	No	No	No	Yes	Yes	Yes	Disagree	Text Random Assignment - balanced	Agree	Undecided	Undecided	Undecided	Disagree	Agree	Agree	Disagree	Agree	Agree
47	Male		3095	Italian		Catholic		Full time	Yes	No	No	Yes	No	Yes	Agree	Text Random Assignment - Neutral
48	Female		2034	Other (please specify)	Romanian	Christian (other)		Full time	No	No	No	Yes	Yes	Yes	Agree	Text Random Assignment - Neutral
41	Male		2010	Other (please specify)	French	No religion		Full time	Yes	Yes	Yes	Yes	Yes	Yes	Agree	Text Random Assignment - Neutral	Strongly agree	Undecided	Agree	Agree	Agree	Disagree	Strongly disagree	Disagree	Undecided	Agree
44	Male		4055	No		No religion		Full time	No	No	Yes	Yes	Yes	Yes	Agree	Text Random Assignment - balanced
42	Female		2576	No		Christian (other)		Full time	Yes	No	No	Yes	Yes	Yes	Agree
46	Female		4500	No		Catholic		Full time	Yes	Yes	Yes	Yes	Yes	Yes	Agree	Text Random Assignment - Neutral
56	Female		3146	No		Catholic		Full time	Yes	No	No	Yes	No	Yes	Disagree
49	Male		7112	No		No religion		Full time	No	No	No	Yes	Yes	Yes	Agree	Text Random Assignment - balanced	Agree	Disagree	Strongly agree	Strongly agree	Disagree	Agree	Agree	Disagree	Strongly agree	Undecided
63	Female		3142	No		No religion		Full time	Yes	No	Yes	Yes	Yes	Yes	Don't know	Text Random Assignment - balanced	Agree	Disagree	Agree	Undecided	Disagree	Undecided	Agree	Disagree	Undecided	Undecided
33	Female		3079	Other (please specify)	Hindi	Buddhism		Full time	No	No	No	Yes	Yes	Yes	Don't know	Text Random Assignment - Neutral	Agree	Disagree	Agree	Undecided	Strongly disagree	Disagree	Undecided	Disagree	Agree	Undecided
38	Male		5453	No		Christian (other)		Full time	No	No	No	Yes	No	Yes	Don't know
58	Male		3150	No		No religion		Full time	No	No	No	Yes	No	Yes	Disagree	Text Random Assignment - Neutral	Agree	Disagree	Agree	Agree	Disagree	Agree	Agree	Disagree	Agree	Undecided
42	Male		2850	No		Catholic		Full time	No	No	Yes	Yes	Yes	Yes	Agree	Text Random Assignment - balanced	Strongly agree	Disagree	Strongly agree	Disagree	Undecided	Disagree	Agree	Undecided	Strongly agree	Undecided
53	Female		3122	No		Catholic		Full time	No	No	No	Yes	Yes	Yes	Agree	Text Random Assignment - balanced	Agree	Disagree	Agree	Undecided	Strongly disagree	Disagree	Strongly agree	Strongly disagree	Agree	Disagree
44	Female		3441	No		No religion		Full time	No	Yes	No	Yes	No	No	Agree	Text Random Assignment - Neutral	Strongly agree	Strongly disagree	Strongly agree	Strongly agree	Strongly agree	Strongly disagree	Disagree	Disagree	Strongly agree	Disagree
57	Male		3073	No		Islam		Full time	No	No	No	No	No	Yes	Disagree	Text Random Assignment - balanced	Strongly agree	Undecided	Strongly agree	Strongly agree	Disagree	Strongly disagree	Undecided	Disagree	Strongly agree	Undecided
44	Female		3132	No		Catholic		Full time	No	No	No	Yes	Yes	Yes	Agree	Text Random Assignment - Neutral
55	Male		2066	No		Catholic		Full time	No	No	Yes	Yes	No	No	Disagree	Text Random Assignment - Neutral	Strongly agree	Disagree	Agree	Agree	Agree	Undecided	Undecided	Strongly disagree	Agree	Disagree
40	Male		2021	No		Catholic		Full time	No	No	No	Unsure	No	No	Agree	Text Random Assignment - Neutral	Agree	Agree	Agree	Disagree	Agree	Agree	Disagree	Disagree	Strongly agree	Agree
37	Male		3012	No		No religion		Full time	No	Yes	No	Unsure	No	No	Agree
59	Female		3146	Other (please specify)	broken Greek	No religion		Full time	No	No	No	Unsure	No	Yes	Agree	Text Random Assignment - balanced	Strongly agree	Disagree	Strongly agree	Disagree	Disagree	Agree	Agree	Undecided	Strongly agree	Undecided
58	Female		3032	No		Catholic		Full time	No	No	No	Unsure	No	No	Don't know	Text Random Assignment - Neutral	Strongly agree	Disagree	Agree	Undecided	Agree	Undecided	Undecided	Undecided	Agree	Agree
58	Male		3149	No		No religion		Full time	No	Yes	No	Yes	No	Yes	Don't know	Text Random Assignment - Neutral	Undecided	Undecided	Undecided	Agree	Undecided	Agree	Undecided	Undecided	Agree	Undecided
50	Male		3130	No		Catholic		Full time	No	No	No	Yes	Yes	Yes	Agree	Text Random Assignment - balanced	Strongly agree	Disagree	Agree	Strongly agree	Disagree	Disagree	Agree	Disagree	Strongly agree	Disagree
55	Male		3065	No		No religion		Full time	No	No	No	Yes	No	Yes	Agree	Text Random Assignment - balanced	Agree	Disagree	Disagree	Agree	Disagree	Agree	Agree	Undecided	Strongly agree	Disagree
57	Male		3351	No		Catholic		Full time	No	Yes	No	Yes	Yes	Yes	Disagree	Text Random Assignment - balanced	Agree	Disagree	Agree	Disagree	Strongly agree	Disagree	Strongly agree	Disagree	Strongly agree	Disagree
57
48	Female		3084	No		Christian (other)		Full time	No	No	No	Yes	Yes	Yes	Don't know	Text Random Assignment - Neutral	Undecided	Agree	Undecided	Agree	Disagree	Disagree	Agree	Disagree	Agree	Agree
49	Female		3029	No		Catholic		Part time	No	No	No	Unsure	No	No	Disagree	Text Random Assignment - balanced	Agree	Disagree	Undecided	Agree	Agree	Agree	Strongly agree	Agree	Strongly agree	Disagree
27	Female		2602	No		Christian (other)		Full time	No	Yes	No	Yes	Yes	No	Agree	Text Random Assignment - balanced	Agree	Agree	Agree	Disagree	Disagree	Agree	Agree	Disagree	Agree	Disagree
30	Male		5037	No		No religion		Full time	No	No	No	Yes	Yes	Yes	Agree	Text Random Assignment - Neutral	Agree	Undecided	Agree	Agree	Disagree	Disagree	Disagree	Disagree	Strongly agree	Undecided
30	Female		3000	Other (please specify)	Tamil	Other (please specify)	Hindu	Full time	No	No	No	Yes	No	Yes	Agree	Text Random Assignment - Neutral	Agree	Undecided	Agree	Agree	Disagree	Undecided	Undecided	Agree	Agree	Agree
43	Male		3149	No		Christian (other)		Full time	No	No	No	No	No	Yes	Don't know	Text Random Assignment - Neutral	Agree	Undecided	Disagree	Agree	Strongly agree	Strongly agree	Undecided	Strongly agree	Strongly agree	Agree
60	Male		3806	No		Christian (other)		Full time	Yes	No	No	Yes	No	No	Don't know	Text Random Assignment - balanced	Strongly agree	Disagree	Agree	Strongly agree	Strongly disagree	Disagree	Strongly agree	Disagree	Strongly agree	Undecided
49	Female		3207	No		Catholic		Full time	Yes	Yes	No	Yes	No	Yes	Agree	Text Random Assignment - balanced	Undecided	Undecided	Agree	Disagree	Strongly disagree	Agree	Disagree	Undecided	Strongly agree	Disagree
25	Female		4000	No		Christian (other)		Full time	No	No	No	Unsure	No	Yes	Agree	Text Random Assignment - Neutral	Agree	Disagree	Disagree	Disagree	Strongly disagree	Strongly disagree	Disagree	Strongly disagree	Strongly agree	Agree
25
48	Male		2099	No		Christian (other)		Full time	No	No	No	Unsure	No	Yes	Don't know	Text Random Assignment - balanced	Agree	Disagree	Strongly agree	Agree	Strongly disagree	Disagree	Strongly agree	Disagree	Strongly agree	Disagree
49	Male		4306	No		Christian (other)		Full time	Yes	Yes	Yes	Yes	Yes	Yes	Agree	Text Random Assignment - Neutral	Agree	Disagree	Agree	Disagree	Disagree	Undecided	Disagree	Disagree	Strongly agree	Undecided
46	Female		4164	No		No religion		Full time	No	No	No	Yes	Yes	Yes	Agree	Text Random Assignment - balanced	Agree	Undecided	Agree	Agree	Agree	Agree	Agree	Agree	Agree	Disagree
25
42	Female		3206	No		No religion		Full time	No	No	No	Yes	No	Yes	Don't know	Text Random Assignment - Neutral
26	Female		3165	No		Christian (other)		Full time	No	No	No	Yes	Yes	No	Agree	Text Random Assignment - balanced	Agree	Disagree	Strongly agree	Agree	Disagree	Disagree	Strongly agree	Disagree	Strongly agree	Disagree
53	Male		3105	No		Catholic		Full time	No	No	No	Unsure	No	No	Don't know	Text Random Assignment - balanced
30	Female		4300	No		Christian (other)		Full time	No	No	No	Yes	No	Yes	Disagree	Text Random Assignment - Neutral	Agree	Disagree	Agree	Agree	Disagree	Disagree	Undecided	Strongly disagree	Strongly agree	Agree
40	Male		2761	Other (please specify)	Hindi	Other (please specify)	Hindu	Full time	No	No	No	Yes	No	No	Don't know	Text Random Assignment - Neutral
57	Female		4061	No		No religion		Full time	Yes	No	No	Yes	Yes	Yes	Disagree	Text Random Assignment - balanced	Agree	Agree	Agree	Agree	Agree	Strongly agree	Strongly agree	Undecided	Agree	Disagree
57	Female		2571	No		No religion		Full time	Yes	Yes	No	Yes	Yes	No	Agree	Text Random Assignment - balanced	Agree	Disagree	Undecided	Agree	Agree	Agree	Strongly agree	Disagree	Strongly agree	Disagree
51	Male		3052	No		Christian (other)		Full time	No	No	No	Yes	No	No	Agree	Text Random Assignment - balanced	Agree	Disagree	Strongly agree	Disagree	Strongly disagree	Strongly disagree	Strongly agree	Strongly disagree	Strongly agree	Strongly disagree
45	Male		3150	Other (please specify)	Arabic, Russian	No religion		Full time	Yes	No	No	Yes	No	Yes	Disagree	Text Random Assignment - balanced	Agree	Disagree	Agree	Agree	Disagree	Agree	Agree	Disagree	Strongly agree	Undecided
46
23	Female		4051	No		No religion		Full time	No	Yes	No	Unsure	No	No	Agree	Text Random Assignment - balanced	Strongly agree	Strongly disagree	Strongly agree	Strongly agree	Strongly disagree	Strongly disagree	Strongly agree	Strongly disagree	Strongly agree	Strongly disagree
33	Female		4054	No		Christian (other)		Part time	No	Yes	No	Yes	No	Yes	Don't know	Text Random Assignment - Neutral	Agree	Disagree	Agree	Disagree	Strongly disagree	Disagree	Undecided	Disagree	Agree	Disagree
41	Female		2065	No		Catholic		Part time	Yes	Yes	No	Yes	Yes	Yes	Disagree	Text Random Assignment - balanced	Strongly agree	Strongly disagree	Strongly agree	Strongly agree	Agree	Agree	Strongly agree	Agree	Strongly agree	Disagree
53	Female		4220	No		Catholic		Full time	No	No	No	Yes	No	Yes	Don't know	Text Random Assignment - balanced	Strongly agree	Disagree	Agree	Agree	Agree	Agree	Agree	Disagree	Agree	Disagree
44	Female		2611	No		No religion		Full time	No	No	No	Yes	Yes	Yes	Agree	Text Random Assignment - Neutral	Agree	Disagree	Agree	Agree	Disagree	Disagree	Disagree	Disagree	Agree	Undecided
45	Male		3072	Italian		Catholic		Full time	Yes	Yes	Yes	Yes	No	Yes	Agree	Text Random Assignment - balanced	Agree	Agree	Strongly agree	Strongly agree	Strongly agree	Agree	Agree	Agree	Agree	Agree
23	Male		4218	No		No religion		Full time	No	No	No	Yes	No	No	Don't know	Text Random Assignment - balanced	Strongly agree	Strongly disagree	Strongly agree	Strongly agree	Disagree	Disagree	Strongly agree	Disagree	Agree	Disagree
52	Male		4211	No		No religion		Full time	Yes	Yes	Yes	Yes	Yes	Yes	Agree	Text Random Assignment - Neutral	Strongly agree	Strongly disagree	Agree	Agree	Strongly disagree	Strongly disagree	Disagree	Disagree	Strongly agree	Strongly disagree
29	Female		3121	No		No religion		Full time	No	No	No	Yes	No	Yes	Agree	Text Random Assignment - balanced	Agree	Undecided	Agree	Agree	Disagree	Agree	Agree	Undecided	Agree	Disagree
34	Male		3024	Other (please specify)	URDU, Punjabi	Islam		Full time	No	No	No	Yes	Yes	Yes	Don't know	Text Random Assignment - balanced	Agree	Disagree	Undecided	Agree	Disagree	Agree	Agree	Undecided	Strongly agree	Undecided
64	Female		3150	No		Catholic		Full time	Yes	No	No	Yes	No	Yes	Agree	Text Random Assignment - Neutral	Strongly agree	Disagree	Undecided	Agree	Disagree	Undecided	Disagree	Disagree	Agree	Disagree
53	Male		7008	No		No religion		Full time	No	No	No	Yes	Yes	Yes	Disagree
52	Female		4037	No		Christian (other)		Full time	No	No	No	Unsure	No	Yes	Agree	Text Random Assignment - balanced	Agree	Undecided	Agree	Undecided	Disagree	Undecided	Agree	Disagree	Strongly agree	Agree
53	Male		kutyf9	No		No religion		Full time	No	No	No	Yes	No	Yes	Agree	Text Random Assignment - balanced	Agree	Disagree	Strongly agree	Strongly agree	Undecided	Agree	Strongly disagree	Disagree	Disagree	Undecided
25
53	Male		4122	No		Christian (other)		Full time	Yes	No	No	Yes	Yes	Yes	Disagree	Text Random Assignment - balanced	Agree	Agree	Agree	Agree	Disagree	Agree	Strongly agree	Agree	Undecided	Disagree
64	Female		2257	No		No religion		Full time	No	No	No	Yes	Yes	Yes	Don't know	Text Random Assignment - balanced	Agree	Disagree	Agree	Undecided	Disagree	Agree	Agree	Disagree	Agree	Undecided
25	Male		2617	No		No religion		Full time	No	Yes	No	Unsure	No	No	Don't know	Text Random Assignment - Neutral
37	Female		3147	No		No religion		Full time	Yes	Yes	No	Unsure	No	No	Agree
43	Male		2153	No		No religion		Full time	Yes	No	No	Yes	No	No	Agree	Text Random Assignment - balanced	Strongly agree	Strongly disagree	Agree	Strongly agree	Strongly disagree	Agree	Strongly agree	Strongly disagree	Strongly agree	Strongly disagree
57	Male		3199	No		Christian (other)		Full time	No	No	No	Yes	Yes	Yes	Don't know	Text Random Assignment - Neutral	Agree	Undecided	Disagree	Agree	Disagree	Agree	Strongly agree	Disagree	Agree	Undecided
61	Male		2112	No		Catholic		Full time	No	No	No	Yes	No	No	Don't know	Text Random Assignment - balanced
44	Male		2902	No		No religion		Full time	No	No	No	Yes	No	No	Agree	Text Random Assignment - balanced	Agree	Undecided	Agree	Disagree	Agree	Agree	Agree	Disagree	Agree	Disagree
47	Male		3032	No		Christian (other)		Full time	No	Yes	No	Unsure	No	No	Agree	Text Random Assignment - Neutral	Agree	Strongly disagree	Agree	Disagree	Strongly disagree	Disagree	Undecided	Strongly disagree	Strongly agree	Agree
52	Female		4053	No		No religion		Full time	Yes	Yes	No	Yes	Yes	Yes	Disagree	Text Random Assignment - balanced	Agree	Disagree	Strongly agree	Undecided	Agree	Disagree	Strongly agree	Disagree	Strongly agree	Undecided
65	Female		4207	No		Christian (other)		Full time	No	No	No	Yes	No	Yes	Agree	Text Random Assignment - Neutral
45	Male		2070	No		Catholic		Full time	No	No	Yes	Yes	No	No	Agree	Text Random Assignment - Neutral	Strongly agree	Disagree	Strongly agree	Agree	Agree	Agree	Disagree	Disagree	Strongly agree	Agree
56	Male		3030	No		Catholic		Full time	No	Yes	No	Unsure	No	Yes	Don't know	Text Random Assignment - balanced	Agree	Disagree	Agree	Agree	Disagree	Disagree	Agree	Disagree	Agree	Disagree
34
54	Male		2250	No		Christian (other)		Full time	No	No	Yes	Yes	Yes	Yes	Agree	Text Random Assignment - Neutral	Agree	Disagree	Agree	Agree	Disagree	Agree	Disagree	Disagree	Agree	Agree
38	Male		3058	No		No religion		Full time	Yes	No	No	Unsure	Yes	Yes	Don't know	Text Random Assignment - Neutral	Strongly agree	Strongly disagree	Undecided	Strongly disagree	Strongly agree	Strongly disagree	Undecided	Strongly disagree	Agree	Strongly agree
42	Male		4560	No		No religion		Full time	Yes	No	No	Unsure	No	Yes	Don't know	Text Random Assignment - Neutral	Agree	Undecided	Agree	Agree	Disagree	Disagree	Undecided	Disagree	Strongly agree	Disagree
27	Female		7018	No		No religion		Full time	No	No	No	Yes	Yes	Yes	Don't know	Text Random Assignment - Neutral	Undecided	Undecided	Undecided	Undecided	Undecided	Undecided	Undecided	Undecided	Undecided	Undecided
50	Female		3039	No		Other (please specify)	Non Donominational	Full time	Yes	No	No	Unsure	No	Yes	Agree	Text Random Assignment - Neutral	Agree	Disagree	Agree	Agree	Strongly disagree	Disagree	Disagree	Strongly disagree	Agree	Strongly disagree
52	Female		3030	No		Catholic		Full time	No	No	No	Unsure	No	No	Don't know	Text Random Assignment - Neutral	Strongly agree	Disagree	Agree	Agree	Agree	Disagree	Undecided	Disagree	Strongly agree	Agree
55	Female		3152	No		Christian (other)		Full time	Yes	No	No	Yes	No	Yes	Agree	Text Random Assignment - Neutral	Agree	Disagree	Agree	Agree	Disagree	Disagree	Agree	Disagree	Agree	Disagree
56	Female		4212	No		No religion		Full time	No	No	No	Yes	No	Yes	Don't know	Text Random Assignment - balanced	Strongly agree	Strongly disagree	Undecided	Strongly agree	Agree	Undecided	Undecided	Agree	Strongly agree	Disagree
44	Male		3188	No		Christian (other)		Full time	Yes	No	No	Yes	Yes	Yes	Disagree	Text Random Assignment - balanced
46	Male		3181	No		Catholic		Full time	No	No	Yes	Yes	Yes	Yes	Don't know	Text Random Assignment - balanced	Strongly agree	Disagree	Strongly agree	Strongly agree	Strongly disagree	Strongly disagree	Strongly agree	Disagree	Strongly agree	Disagree
35	Male		3070	Other (please specify)	german, portuguese	No religion		Full time	No	No	No	Yes	No	No	Agree	Text Random Assignment - Neutral	Strongly disagree	Disagree	Strongly agree	Undecided	Undecided	Disagree	Disagree	Disagree	Strongly agree	Agree
39	Female		3206	No		Christian (other)		Full time	No	No	No	Yes	No	No	Agree	Text Random Assignment - balanced	Agree	Disagree	Agree	Agree	Agree	Undecided	Disagree	Disagree	Agree	Undecided
25
66	Male		3124	No		No religion		Full time	No	No	No	No	No	Yes	Agree	Text Random Assignment - balanced	Undecided	Undecided	Disagree	Disagree	Disagree	Agree	Disagree	Disagree	Agree	Undecided
23	Male		4500	No		Buddhism		Part time	No	No	No	Yes	Yes	Yes	Disagree	Text Random Assignment - Neutral
58	Male		2265	No		Other (please specify)	Athiest	Full time	Yes	Yes	No	Yes	No	No	Don't know	Text Random Assignment - balanced	Agree	Undecided	Undecided	Disagree	Strongly disagree	Disagree	Agree	Strongly disagree	Disagree	Agree
37	Female		3218	No		No religion		Part time	No	Yes	Yes	Unsure	No	Yes	Disagree	Text Random Assignment - Neutral	Strongly agree	Disagree	Agree	Agree	Strongly agree	Disagree	Undecided	Undecided	Strongly agree	Undecided
43	Male		2066	No		Christian (other)		Full time	No	No	No	Yes	No	Yes	Agree	Text Random Assignment - balanced	Agree	Disagree	Agree	Disagree	Agree	Disagree	Agree	Strongly disagree	Strongly agree	Agree
66	Male		3124	No		No religion		Full time	No	No	No	No	No	Yes	Agree	Text Random Assignment - balanced	Undecided	Undecided	Agree	Disagree	Disagree	Agree	Disagree	Disagree	Strongly agree	Undecided
40	Female		3183	No		No religion		Part time	No	Yes	No	Yes	No	No	Don't know	Text Random Assignment - balanced
23
26	Male		3039	No		Other (please specify)	Hindu	Full time	No	No	No	Yes	No	No	Agree	Text Random Assignment - Neutral	Agree	Undecided	Strongly agree	Undecided	Disagree	Strongly disagree	Disagree	Strongly disagree	Strongly agree	Agree
24	Female		4161	No		Christian (other)		Full time	No	Yes	No	Yes	No	Yes	Disagree	Text Random Assignment - Neutral	Agree	Strongly disagree	Undecided	Undecided	Agree	Strongly disagree	Undecided	Disagree	Agree	Agree
27	Female		3185	No		No religion		Full time	No	No	No	Unsure	Yes	Yes	Agree	Text Random Assignment - Neutral
45	Male		3004	No		Catholic		Full time	Yes	No	No	Yes	Yes	Yes	Agree	Text Random Assignment - Neutral	Agree	Disagree	Agree	Undecided	Disagree	Disagree	Disagree	Disagree	Agree	Agree
51	Female		4300	No		Christian (other)		Full time	Yes	No	Yes	Unsure	No	Yes	Agree	Text Random Assignment - balanced	Strongly agree	Disagree	Agree	Agree	Disagree	Undecided	Agree	Disagree	Strongly agree	Disagree
59	Male		3084	No		No religion		Full time	No	No	No	Yes	Yes	Yes	Don't know	Text Random Assignment - Neutral	Undecided	Disagree	Disagree	Agree	Agree	Agree	Undecided	Disagree	Agree	Agree
64	Male		3095	No		Christian (other)		Full time	No	No	No	Yes	No	No	Agree	Text Random Assignment - Neutral	Agree	Disagree	Agree	Disagree	Disagree	Disagree	Undecided	Disagree	Strongly agree	Agree
32	Female		2008	No		No religion		Full time	Yes	No	No	Yes	Yes	No	Don't know	Text Random Assignment - Neutral	Strongly agree	Strongly disagree	Strongly agree	Strongly agree	Agree	Strongly disagree	Strongly disagree	Strongly disagree	Strongly agree	Undecided
45	Male		3084	Other (please specify)	Swedish	No religion		Full time	No	No	No	Yes	No	Yes	Don't know	Text Random Assignment - balanced	Strongly agree	Undecided	Agree	Agree	Disagree	Agree	Strongly agree	Disagree	Agree	Disagree
32	Female		2008	No		No religion		Full time	Yes	No	No	Yes	Yes	No	Don't know	Text Random Assignment - Neutral	Strongly agree	Strongly disagree	Strongly agree	Strongly agree	Strongly disagree	Strongly disagree	Strongly disagree	Strongly disagree	Strongly agree	Undecided
55	Female		3152	No		Other (please specify)	Catholic raised	Part time	No	Yes	No	Yes	Yes	Yes	Agree	Text Random Assignment - balanced	Agree	Undecided	Agree	Agree	Undecided	Agree	Agree	Undecided	Agree	Undecided
26	Female		4551	No		No religion		Full time	No	No	No	Yes	No	No	Agree	Text Random Assignment - Neutral	Disagree	Agree	Disagree	Undecided	Disagree	Agree	Disagree	Disagree	Strongly agree	Disagree
41	Female		4012	No		Christian (other)		Full time	No	No	Yes	Yes	Yes	Yes	Disagree	Text Random Assignment - Neutral	Agree	Disagree	Agree	Strongly agree	Disagree	Disagree	Agree	Disagree	Agree	Disagree
32	Female		2008	No		No religion		Full time	Yes	No	No	Yes	Yes	Yes	Don't know	Text Random Assignment - Neutral
41	Male		3146	No		Christian (other)		Full time	Yes	No	No	Yes	Yes	Yes	Disagree	Text Random Assignment - Neutral
35
56	Male		4880	No		No religion		Full time	No	No	No	Yes	Yes	Yes	Agree	Text Random Assignment - Neutral
61
25	Female		3121	No		Christian (other)		Full time	Yes	Yes	Yes	Yes	Yes	Yes	Disagree	Text Random Assignment - balanced	Strongly agree	Strongly disagree	Strongly agree	Agree	Agree	Strongly disagree	Strongly agree	Strongly disagree	Strongly agree	Strongly disagree
50	Female		5290	No		No religion		Full time	Yes	Yes	Yes	Yes	No	Yes	Agree	Text Random Assignment - Neutral	Undecided	Undecided	Undecided	Agree	Agree	Agree	Strongly agree	Disagree	Strongly agree	Disagree
41	Female		3141	No		Catholic		Full time	Yes	No	No	Yes	No	No	Don't know	Text Random Assignment - balanced	Strongly agree	Disagree	Agree	Undecided	Strongly agree	Strongly disagree	Strongly agree	Disagree	Strongly agree	Disagree
44	Female		3977	No		Catholic		Full time	No	No	No	Yes	Yes	Yes	Don't know	Text Random Assignment - balanced	Agree	Disagree	Agree	Undecided	Agree	Disagree	Strongly agree	Strongly disagree	Strongly agree	Undecided
36	Female		3135	No		No religion		Full time	Yes	No	No	Yes	Yes	Yes	Agree	Text Random Assignment - Neutral	Strongly agree	Strongly disagree	Strongly agree	Strongly agree	Strongly disagree	Strongly disagree	Undecided	Strongly disagree	Strongly agree	Strongly disagree
42	Female		3058	No		Catholic		Full time	No	Yes	No	Yes	Yes	Yes	Agree	Text Random Assignment - Neutral	Strongly agree	Disagree	Strongly agree	Strongly agree	Undecided	Agree	Agree	Disagree	Strongly agree	Undecided
48	Female		2068	No		Catholic		Full time	No	No	No	Yes	No	Yes	Agree
34	Male		4518	No		No religion		Full time	No	No	No	Yes	Yes	Yes	Disagree	Text Random Assignment - balanced	Agree	Strongly disagree	Agree	Strongly agree	Agree	Agree	Agree	Undecided	Agree	Strongly disagree
55	Female		4521	No		Catholic		Full time	Yes	No	Yes	Yes	Yes	Yes	Agree	Text Random Assignment - Neutral
47	Male		3071	No		No religion		Full time	No	No	No	Yes	No	No	Don't know	Text Random Assignment - balanced	Strongly agree	Strongly disagree	Strongly agree	Strongly agree	Strongly disagree	Strongly disagree	Strongly agree	Strongly disagree	Strongly agree	Disagree
49	Female		3178	No		Catholic		Full time	No	No	No	Yes	No	No	Agree	Text Random Assignment - Neutral
27	Female		3051	No		Catholic		Full time	No	No	No	Yes	Yes	Yes	Disagree	Text Random Assignment - balanced	Agree	Disagree	Agree	Undecided	Disagree	Agree	Strongly agree	Disagree	Agree	Agree
52	Male		4350	No		Catholic		Full time	Yes	No	No	Yes	No	Yes	Agree	Text Random Assignment - Neutral	Strongly agree	Disagree	Strongly agree	Agree	Strongly disagree	Strongly disagree	Disagree	Disagree	Agree	Disagree
45	Female		3068	No		No religion		Full time	No	No	No	Yes	Yes	Yes	Agree
35	Male		2612	No		Other (please specify)	Hindu	Full time	Yes	Yes	No	Yes	No	No	Agree	Text Random Assignment - Neutral	Agree	Undecided	Agree	Disagree	Agree	Strongly disagree	Agree	Undecided	Strongly agree	Strongly disagree
38	Male		2011	No		No religion		Full time	Yes	Yes	No	Yes	Yes	Yes	Agree	Text Random Assignment - Neutral	Strongly agree	Strongly disagree	Strongly agree	Agree	Agree	Disagree	Strongly disagree	Disagree	Strongly agree	Agree
34	Female		4810	No		No religion		Full time	No	No	No	Yes	No	Yes	Agree	Text Random Assignment - balanced	Undecided	Agree	Undecided	Undecided	Agree	Agree	Undecided	Agree	Strongly agree	Strongly agree
55	Male		2089	No		No religion		Full time	No	No	No	Yes	Yes	Yes	Agree	Text Random Assignment - Neutral	Agree	Disagree	Agree	Agree	Disagree	Agree	Disagree	Strongly disagree	Agree	Undecided
45	Female		2000	No		No religion		Full time	No	No	No	Yes	Yes	Yes	Agree	Text Random Assignment - balanced	Agree	Disagree	Agree	Agree	Agree	Agree	Agree	Disagree	Agree	Disagree
50	Female		3134	No		Christian (other)		Full time	No	No	Yes	Yes	Yes	Yes	Agree	Text Random Assignment - balanced	Agree	Disagree	Agree	Strongly agree	Strongly disagree	Agree	Agree	Strongly agree	Disagree	Disagree
57	Female		3121	No		Catholic		Full time	No	No	No	Yes	Yes	Yes	Agree	Text Random Assignment - balanced	Strongly agree	Undecided	Agree	Agree	Strongly disagree	Agree	Strongly agree	Disagree	Strongly agree	Disagree
38	Female		2141	Greek		Christian (other)		Full time	Yes	No	Yes	Yes	Yes	Yes	Agree	Text Random Assignment - Neutral
48	Female		46	Other (please specify)	URDU	Islam		Full time	No	No	No	Unsure	No	No	Don't know	Text Random Assignment - balanced
55	Male		5125	No		Christian (other)			No	Yes	No	Yes	Yes	Yes	Agree	Text Random Assignment - Neutral
27	Male		3145	No		No religion		Full time	No	No	No	Yes	Yes	Yes	Disagree	Text Random Assignment - balanced	Agree	Undecided	Strongly agree	Agree	Disagree	Agree	Agree	Disagree	Strongly agree	Undecided
52	Female		4068	No		No religion		Full time	No	No	No	Yes	Yes	Yes	Agree	Text Random Assignment - Neutral	Undecided	Undecided	Agree	Undecided	Agree	Agree	Agree	Disagree	Agree	Undecided
33	Female		3030	Cantonese		No religion		Full time	No	No	No	Yes	Yes	Yes	Agree	Text Random Assignment - Neutral	Strongly agree	Strongly agree	Strongly agree	Strongly agree	Disagree	Disagree	Strongly agree	Disagree	Strongly agree	Strongly agree
42	Female		3104	Cantonese		No religion		Full time	No	No	No	Yes	No	No	Agree	Text Random Assignment - balanced	Agree	Disagree	Disagree	Agree	Disagree	Disagree	Agree	Disagree	Agree	Disagree
46	Female		3131	Greek		Other (please specify)	orthodox	Full time	No	No	No	Unsure	No	Yes	Don't know	Text Random Assignment - Neutral	Undecided	Undecided	Undecided	Undecided	Undecided	Undecided	Undecided	Undecided	Undecided	Undecided
38	Male		3165	No		Christian (other)		Full time	No	No	No	Unsure	No	No	Agree	Text Random Assignment - balanced	Undecided	Agree	Undecided	Undecided	Disagree	Agree	Strongly agree	Disagree	Strongly agree	Disagree
37	Male		3183	No		No religion		Full time	No	No	No	Yes	Yes	Yes	Agree	Text Random Assignment - Neutral	Strongly agree	Strongly disagree	Strongly agree	Agree	Agree	Disagree	Disagree	Disagree	Agree	Agree
39	Male		3434	No		No religion		Full time	Yes	No	No	Yes	Yes	Yes	Disagree	Text Random Assignment - balanced	Strongly agree	Undecided	Undecided	Disagree	Disagree	Agree	Strongly agree	Disagree	Strongly agree	Undecided
37	Male		3029	Other (please specify)	Bangali	Islam		Full time	Yes	No	No	Unsure	No	No	Don't know	Text Random Assignment - Neutral	Undecided	Undecided	Disagree	Strongly disagree	Strongly disagree	Undecided	Agree	Strongly disagree	Agree	Strongly agree
56	Female		3040	No		Christian (other)		Full time	No	No	No	Yes	Yes	Yes	Don't know	Text Random Assignment - Neutral	Strongly agree	Strongly disagree	Strongly agree	Agree	Strongly disagree	Undecided	Disagree	Strongly disagree	Strongly agree	Disagree
37	Female		6560	No		No religion		Part time	No	No	No	Yes	Yes	Yes	Disagree	Text Random Assignment - Neutral
27	Female		3072	Other (please specify)	Maltese	Catholic		Full time	No	No	No	Yes	No	Yes	Agree
27	Female		2023	No		No religion		Full time	No	No	No	Yes	Yes	Yes	Disagree	Text Random Assignment - balanced	Undecided	Agree	Undecided	Undecided	Strongly disagree	Agree	Strongly agree	Agree	Strongly agree	Disagree
56	Male		3182	No		No religion		Full time	Yes	No	No	Yes	Yes	Yes	Agree	Text Random Assignment - balanced	Strongly agree	Strongly disagree	Strongly agree	Strongly agree	Agree	Strongly agree	Strongly agree	Disagree	Strongly agree	Disagree
47	Female		2000	Other (please specify)	.	Christian (other)		Full time	Yes	Yes	No	Unsure	No	No	Don't know	Text Random Assignment - balanced	Disagree	Strongly agree	Strongly disagree	Strongly disagree	Agree	Strongly agree	Agree	Strongly agree	Strongly agree	Undecided
45	Male		3152	No		Christian (other)		Full time	Yes	No	No	Yes	No	Yes	Don't know	Text Random Assignment - Neutral	Strongly agree	Disagree	Agree	Undecided	Disagree	Disagree	Agree	Disagree	Agree	Agree
57	Male		3067	No		No religion		Full time	No	No	No	Yes	No	Yes	Agree	Text Random Assignment - Neutral	Agree	Disagree	Undecided	Disagree	Undecided	Agree	Disagree	Undecided	Agree	Disagree
40	Female		3071	Greek		Other (please specify)	Orthodox	Full time	No	Yes	Yes	Unsure	No	No	Agree	Text Random Assignment - balanced	Undecided	Agree	Disagree	Disagree	Agree	Undecided	Agree	Undecided	Strongly agree	Strongly agree
54	Male		2234	No		Christian (other)		Full time	No	No	No	Yes	No	No	Agree	Text Random Assignment - Neutral	Strongly agree	Strongly disagree	Strongly agree	Strongly agree	Strongly disagree	Disagree	Disagree	Strongly agree	Strongly agree	Agree
49	Female		5118	No		Christian (other)		Full time	No	No	No	Yes	Yes	Yes	Don't know	Text Random Assignment - Neutral	Undecided	Undecided	Disagree	Agree	Agree	Agree	Undecided	Undecided	Strongly agree	Agree
30	Female		3030	Arabic		Christian (other)		Full time	Yes	No	Yes	Yes	No	Yes	Agree	Text Random Assignment - Neutral	Agree	Agree	Undecided	Agree	Strongly disagree	Undecided	Strongly agree	Undecided	Agree	Agree
49	Female		3029	No		Buddhism		Full time	Yes	Yes	Yes	Yes	Yes	Yes	Agree	Text Random Assignment - balanced	Strongly agree	Strongly disagree	Strongly agree	Strongly agree	Strongly disagree	Disagree	Agree	Strongly agree	Strongly agree	Strongly agree
52	Female		3107	No		Catholic		Full time	Yes	No	Yes	Yes	Yes	Yes	Agree	Text Random Assignment - Neutral	Undecided	Undecided	Disagree	Undecided	Agree	Undecided	Disagree	Undecided	Agree	Undecided
24	Female		6000	Other (please specify)	tagalog	Catholic		Full time	No	No	No	Yes	No	No	Agree	Text Random Assignment - Neutral	Agree	Disagree	Agree	Agree	Undecided	Disagree	Agree	Disagree	Strongly agree	Agree
49
23	Male		3000	No		Other (please specify)	presbyterian	Full time	No	Yes	No	Unsure	No	No	Don't know	Text Random Assignment - Neutral	Agree	Disagree	Undecided	Agree	Agree	Disagree	Agree	Disagree	Agree	Undecided
60	Male		3129	No		Catholic		Full time	Yes	No	Yes	Yes	No	Yes	Agree	Text Random Assignment - balanced	Undecided	Undecided	Undecided	Disagree	Disagree	Agree	Agree	Disagree	Agree	Agree
51	Male		3182	No		Catholic		Full time	No	Yes	No	Yes	Yes	Yes	Agree	Text Random Assignment - balanced
51	Female		3106	Italian		Catholic		Full time	No	No	No	Unsure	No	Yes	Don't know	Text Random Assignment - Neutral	Agree	Undecided	Agree	Strongly agree	Disagree	Undecided	Agree	Strongly agree	Agree	Disagree
45	Male		3040	No		Catholic		Full time	No	No	No	Unsure	No	No	Agree	Text Random Assignment - Neutral	Agree	Disagree	Agree	Agree	Disagree	Agree	Agree	Strongly disagree	Strongly agree	Disagree
34	Female		3138	No		No religion		Full time	No	Yes	Yes	Yes	Yes	Yes	Agree	Text Random Assignment - balanced	Agree	Disagree	Strongly agree	Strongly agree	Disagree	Disagree	Agree	Disagree	Strongly agree	Disagree
21	Male		3000	No		No religion		Full time	Yes	Yes	No	Yes	Yes	Yes	Agree	Text Random Assignment - Neutral	Undecided	Disagree	Undecided	Strongly disagree	Disagree	Strongly disagree	Disagree	Disagree	Undecided	Strongly agree
33	Male		2640	No		No religion		Full time	No	No	No	Yes	Yes	Yes	Agree	Text Random Assignment - Neutral	Agree	Disagree	Agree	Agree	Disagree	Undecided	Disagree	Undecided	Strongly agree	Undecided
37	Male		3204	No		Other (please specify)	Judaism	Full time	No	No	No	Unsure	No	Yes	Agree	Text Random Assignment - balanced	Agree	Disagree	Agree	Agree	Agree	Agree	Agree	Undecided	Agree	Agree
27	Female		5043	No		No religion		Full time	No	No	No	Yes	Yes	No	Don't know	Text Random Assignment - Neutral	Agree	Disagree	Agree	Disagree	Disagree	Undecided	Undecided	Disagree	Strongly agree	Strongly agree
56	Female		3196	No		Christian (other)		Full time	No	No	No	Yes	Yes	Yes	Don't know	Text Random Assignment - balanced
